# Supplementary material for: Caffeoylquinic Acids and Flavonoids of Fringed Sagewort (Artemisia frigida Willd.): HPLC-DAD-ESI-QQQ-MS Profile, HPLC-DAD Quantification, in Vitro Digestion Stability, and Antioxidant Capacity
Source: PubMed Central journal article supplement (PMC6720735; doi:10.3390/antiox8080307), 2019-08-14

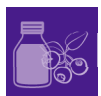

Supplementary materials

# Caffeoylquinic Acids and Flavonoids of Fringed Sagewort (*Artemisia frigida* Willd.): HPLC-DAD-ESI-QQQ-MS Profile, HPLC-DAD Quantification, *in vitro* Digestion Stability, and Antioxidant Capacity

Daniil N. Olennikov <sup>1,\*</sup>, Nina I. Kashchenko <sup>1</sup>, Nadezhda K. Chirikova <sup>2</sup>, Aina G. Vasil'eva <sup>2</sup>, Aydan I. Gadimli <sup>3</sup>, Javanshir I. Isaev <sup>3</sup>, and Cecile Vennos <sup>4</sup>

<sup>1</sup> Laboratory of Medical and Biological Research, Institute of General and Experimental Biology, Siberian Division, Russian Academy of Science, 6 Sakh'yarovoy Street, Ulan-Ude 670047, Russia; ninkk@mail.ru

<sup>2</sup> Department of Biochemistry and Biotechnology, North-Eastern Federal University, 58 Belinsky Street, Yakutsk 677027, Russia; hofnung@mail.ru (N.K.C.), ainagvas@mail.ru (A.G.V.)

<sup>3</sup> Department of Pharmacognosy, Azerbaijan Medical University, Anvar Gasimzade Street 14, Baku AZ1022, Azerbaijan; aydangadimli25@gmail.com (A.I.G.), isayev.cavanshir@amu.edu.az (J.I.I.)

<sup>4</sup> Regulatory and Medical Scientific Affairs, Padma AG, 1 Underfeldstrasse, Hinwil CH-8340, Switzerland; c.vennos@padma.ch

\* Correspondence: olennikovdn@mail.ru; Tel.: +7-9021-600-627 (D.N.O.)

Received: date; Accepted: date; Published: date

**Abstract:** Fringed sagewort (*Artemisia frigida* Willd., Compositae family) is a well-known medicinal plant in Asian medical systems. Fifty-nine hydroxycinnamates and flavonoids have been found in *A. frigida* herbs of Siberian origin by high-performance liquid chromatography with diode array and electrospray triple quadrupole mass detection (HPLC-DAD-ESI-QQQ-MS). Their structures were determined after mass fragmentation analysis as caffeoylquinic acids, flavone O-/C-glycosides, flavones and flavonol aglycones. Most of the discovered components were described in *A. frigida* for the first time. It was shown that flavonoids with different types of substitution have chemotaxonomic significance for species of *Artemisia* subsection Frigidae (section Absinthium). After HPLC-DAD quantification of 16 major phenolics in 21 Siberian populations of *A. frigida* and subsequent principal component analysis, we found substantial variation in the selected compounds, suggesting the existence of two geographical groups of *A. frigida*. The antioxidant activity of *A. frigida* herbal tea was determined using 2,2-diphenyl-1-picrylhydrazyl free radical (DPPH<sup>•</sup>) and hydrophilic/lipophilic oxygen radical absorbance capacity (ORAC) assays and DPPH<sup>•</sup>-HPLC profiling, revealing it to be high. The effect of digestive media on the phenolic profile and antioxidant capacity of *A. frigida* herbal tea was assessed under simulated gastrointestinal digestion. We found a minor reduction in caffeoylquinic acid content and ORAC values, but remaining levels were satisfactory for antioxidant protection. These results suggest that *A. frigida* and its food derivate herbal tea could be recommended as new plant antioxidants rich in phenolics.

**Keywords:** *Artemisia frigida*; Compositae (Asteraceae); caffeoylquinic acids; flavonoids; HPLC; mass spectrometry; chemotaxonomy; antioxidant capacity; ORAC.

## List of Supplementary Content

**Table S1.** Ethnopharmacological use of *Artemisia frigida* (fringed sagewort) by the various nomadic people.

**Table S2.** Phenolic compounds of *A. frigida* (literature data).

**Table S3.** Regression equations, correlation coefficients ( $r^2$ ), standard deviation ( $S_{yx}$ ), limits of detection (LOD), limits of quantification (LOQ) and linear ranges for 16 compounds.

**Table S4.** Intra- and inter-day precision, repeatability, stability and recovery for 16 compounds.

**Table S5.** Content of selected caffeoylquinic acids and flavonoids in the 21 samples of *A. frigida* herb.

**Table S6.** Macronutrients, free sugars, organic acids, amino acids and mineral composition of *A. frigida* herbal tea.

**Table S7.** Demographic information of participants of tea sensory evaluation.

**Table S8.** Sensory evaluation data of *A. frigida* herbal tea, green tea, black tea and *Artemisia absinthium* tea.

**Table S9.** Phytochemical composition of *A. frigida* herbal tea.

**Figure S1.** Mass spectra of compounds 1–59, found in *A. frigida*.

**Figure S2.** Structures of reference standards used in present work.

**Figure S3.** A series of three successive chromatograms of *A. frigida* extract demonstrating good reproducibility of the method used.

**Figure S4.** HPLC-DAD chromatograms of *A. frigida* extract of leaves, flowers, stems and roots.

**Figure S5.** HPLC-DAD chromatogram of the reference mixture of 16 pure compounds and internal standard.

**Figure S6.** Calibration curves for 16 reference compounds used for quantitative HPLC-DAD assay.

**Figure S7.** Sensory profiles of *A. frigida* herbal tea, green tea, black tea and *Artemisia absinthium* tea according to 30 participants estimation.

**Figure S8.** HPLC-DAD chromatogram of *A. frigida* herbal tea.

**Table S1.** Ethnopharmacological use of *Artemisia frigida* (fringed sagewort) by the various nomadic people.

| Description of use                                 | Citation [ref.]                                                                                                                                                                                                                                                                                                                                                                                                                                        |
|----------------------------------------------------|--------------------------------------------------------------------------------------------------------------------------------------------------------------------------------------------------------------------------------------------------------------------------------------------------------------------------------------------------------------------------------------------------------------------------------------------------------|
|                                                    | Buryats, Tuvans, Soyots                                                                                                                                                                                                                                                                                                                                                                                                                                |
| Wound healing, kidney and lung diseases            | “About white <i>mkhan pa</i> <sup>a</sup> called <i>a krong</i> : <i>A krong</i> grows at the base of gravelly placers. The leaves are white, short, bushy. Its height is about span or as an index finger. The flowers are yellow. The smell is sweet. The name is <i>little mkhan pa with golden head</i> . It can pacify <i>skrans</i> , and used to treat <i>bras</i> and wounds, it takes out diseases from the lung and useful for kidneys.” [5] |
| Nosebleeds                                         | “The decoction of barberry wood, cold sagebrush and bear bile best of all stops nosebleeds” (recipe No 113) [6]                                                                                                                                                                                                                                                                                                                                        |
| Kidney and blood diseases, diabetes, edemas        | “The decoction from the buckthorn, ferula, ephedra, cold sagebrush, rhododendron, true cardamom, emblica, phlomis, valerian and juniper berries used for the treatment of kidney diseases, edemas caused by fight of <i>heat</i> and <i>cold</i> , and blood diseases in general.” (recipe No 113) [6]                                                                                                                                                 |
| Kidney diseases, diabetes, diabetes, digestive     | “White <i>a krong</i> is useful for kidney diseases, and it is a good remedy improves digestion of food juices (also called <i>bchud len</i> ).” [7]                                                                                                                                                                                                                                                                                                   |
| Hypertension, diabetes, hemorrhage, swollen joints | Verbal information [8].                                                                                                                                                                                                                                                                                                                                                                                                                                |
|                                                    | Yakuts                                                                                                                                                                                                                                                                                                                                                                                                                                                 |
| Digestive, diabetes, hemorrhage, wound healing     | Personal communication (based on the verbal information) [9]                                                                                                                                                                                                                                                                                                                                                                                           |
|                                                    | Mongols                                                                                                                                                                                                                                                                                                                                                                                                                                                |
| Wound healing, ulcers                              | Verbal information [8].                                                                                                                                                                                                                                                                                                                                                                                                                                |

<sup>a</sup> “*Mkhan pa*” is the general term for four varieties of *Artemisia* (white, whitish, red, black) described in *Shel Pkhreng*.

Table S2. Phenolic compounds of *A. frigida* (literature data).

| Compound                                                                                | Origin of herb |       |                |        | Content, mg/g | Ref.       |
|-----------------------------------------------------------------------------------------|----------------|-------|----------------|--------|---------------|------------|
|                                                                                         | North America  | China | Inner Mongolia | Russia |               |            |
| <i>Flavones</i>                                                                         |                |       |                |        |               |            |
| Apigenin                                                                                | +              |       |                |        | 0.0004        | [13]       |
| Schaftoside (api-6-C-Glc-8-C-Ara)                                                       |                |       |                | +      |               | [20]       |
| Isoschaftoside (api-6-C-Ara-8-C-Glc)                                                    |                |       |                | +      |               | [20]       |
| Vicenin-2 (api-6,8-di-C-Glc)                                                            |                |       |                | +      |               | [20]       |
| Hispidulin (dinatin)                                                                    | +              |       |                |        | 0.02          | [13]       |
| Luteolin                                                                                | +              | +     |                |        | 0.04          | [13,14]    |
| Cynaroside (lut-7-O-Glc)                                                                | +              |       |                |        | 0.02          | [13]       |
| Chrysoeriol                                                                             | +              |       |                |        |               | [13]       |
| Chrysoeriol-4'-O-Glc                                                                    |                | +     |                |        | 0.001–12.97   | [15,16]    |
| Diosmetin                                                                               |                | +     |                |        | 1.11–6.81     | [14,16]    |
| Luteolin-3',4'-dimethyl ether                                                           | +              |       |                |        |               | [13]       |
| Luteolin-3',4'-dimethyl ether-7-O-GlcA                                                  |                | +     | +              |        | 0.0007–1.56   | [15,16,19] |
| 5,7,3',4',5'-Pentahydroxyflavone-7-O-GlcA (friginoside C*)                              |                |       | +              |        |               | [18]       |
| Tricin                                                                                  | +              |       |                |        | 0.001         | [13]       |
| Tricin-7-O-(2''-O-GlcA)GlcA-4'-O-Glc (friginoside D*)                                   |                | +     |                |        | 0.38–0.66     | [17]       |
| 5,7-Dihydroxy-3',4',5'-trimethoxyflavone-7-O-GlcA (friginoside A)                       |                | +     | +              |        | 0.001–1.09    | [15,16,19] |
| 5,7-Dihydroxy-3',4',5'-trimethoxyflavone-7-O-(2''-O-GlcA)GlcA (friginoside B)           |                | +     |                |        | 0.001–3.23    | [15,16]    |
| 5,7-Dihydroxy-3',4',5'-trimethoxyflavone-5-O-GlcA-7-O-(2''-O-GlcA)GlcA (friginoside C*) |                | +     |                |        | 0.43–0.81     | [17]       |
| Nepetin (eupafolin)                                                                     | +              |       |                |        | 0.001         | [13]       |
| Jaceosidin                                                                              | +              |       |                | +      | 0.009         | [13,20]    |
| Desmethylcentaureidin                                                                   |                | +     | +              |        | 0.56–4.40     | [15,16,19] |
| Eupatorin                                                                               |                | +     | +              |        | 0.98–3.83     | [15,16,19] |
| Cirsilineol                                                                             |                |       |                | +      |               | [20]       |
| Eupatilin                                                                               | +              |       |                |        | 0.04          | [13]       |
| 5,7,3',4'-Tetrahydroxy-6,5'-dimethoxyflavone                                            | +              |       |                |        | 0.001         | [13]       |
| 5,7,3'-Trihydroxy-6,4',5'-trimethoxyflavone                                             | +              |       |                |        |               | [12]       |
| 5,7,4'-Trihydroxy-6,3',5'-trimethoxyflavone                                             | +              |       |                |        |               | [12]       |
| 5,7,3',4',5'-Pentahydroxy-6,8-dimethoxyflavone-7-O-GlcA-4'-O-Glc (friginoside E)        |                | +     |                |        | 0.34–0.49     | [17]       |
| <i>Flavonols</i>                                                                        |                |       |                |        |               |            |
| Quercetin                                                                               |                | +     |                |        |               | [14]       |
| 5,3'-Dihydroxy-3,6,7,4'-tetramethoxyflavone                                             |                | +     | +              |        |               | [14,19]    |
| Quercetagenin-3,6,3',4'-tetramethyl ether                                               | +              |       |                |        | 0.001         | [13]       |
| <i>Biflavones</i>                                                                       |                |       |                |        |               |            |
| 8-O-8'''-Biluteolin-7,7'''-O-GlcA (friginoside D*)                                      |                |       | +              |        |               | [18]       |
| <i>Coumarins</i>                                                                        |                |       |                |        |               |            |
| Umbelliferone                                                                           |                | +     |                |        |               | [14]       |
| Herniarin                                                                               |                | +     |                |        |               | [14]       |
| Esculetin                                                                               |                | +     |                |        |               | [14]       |
| 5,6-Dihydroxy-7-methoxycoumarin                                                         |                | +     |                |        |               | [14]       |
| <i>Phenylpropanoids</i>                                                                 |                |       |                |        |               |            |
| Caffeic acid                                                                            |                | +     |                |        |               | [14]       |

\* This name is also used for compound with another structure. Abbreviation used: api – apigenin, Ara – arabinosyl, Glc – glucosyl, lut – luteolin. The presence of a compound indicated as «+».

**Table S3.** Regression equations, correlation coefficients ( $r^2$ ), standard deviation ( $S_{yx}$ ), limits of detection (LOD), limits of quantification (LOQ) and linear ranges for 16 compounds.

| Compound <sup>a</sup> | Regression equation         | $r^2$  | $S_{yx}$             | LOD<br>( $\mu\text{g/mL}$ ) | LOQ<br>( $\mu\text{g/mL}$ ) | Linear range<br>( $\mu\text{g/mL}$ ) |
|-----------------------|-----------------------------|--------|----------------------|-----------------------------|-----------------------------|--------------------------------------|
| 4-CQA                 | $y = 0.046 \cdot x - 0.045$ | 0.9999 | $9.26 \cdot 10^{-3}$ | 0.68                        | 2.06                        | 2.5–500.0                            |
| 5-CQA                 | $y = 0.058 \cdot x - 0.043$ | 0.9999 | $1.53 \cdot 10^{-3}$ | 0.12                        | 0.36                        | 1.0–500.0                            |
| 3,4-dCQA              | $y = 0.061 \cdot x - 0.011$ | 0.9999 | $2.64 \cdot 10^{-3}$ | 0.79                        | 2.39                        | 2.5–500.0                            |
| 3,5-dCQA              | $y = 0.063 \cdot x - 0.046$ | 0.9999 | $9.20 \cdot 10^{-3}$ | 0.66                        | 2.00                        | 2.5–500.0                            |
| 4,5-dCQA              | $y = 0.062 \cdot x - 0.026$ | 0.9999 | $6.61 \cdot 10^{-3}$ | 0.83                        | 2.51                        | 3.0–500.0                            |
| 3,4,5-tCQA            | $y = 0.072 \cdot x - 0.061$ | 0.9999 | $8.14 \cdot 10^{-3}$ | 0.84                        | 2.54                        | 3.0–500.0                            |
| Vicenin-2             | $y = 0.047 \cdot x - 0.035$ | 0.9999 | $4.01 \cdot 10^{-3}$ | 0.49                        | 1.48                        | 2.0–500.0                            |
| Isoorientin           | $y = 0.059 \cdot x - 0.018$ | 0.9999 | $6.11 \cdot 10^{-3}$ | 0.34                        | 1.04                        | 1.5–500.0                            |
| Cynaroside            | $y = 0.092 \cdot x - 0.012$ | 0.9999 | $9.02 \cdot 10^{-3}$ | 0.32                        | 0.98                        | 1.0–500.0                            |
| Apigenin              | $y = 0.037 \cdot x - 0.021$ | 0.9999 | $2.35 \cdot 10^{-3}$ | 0.21                        | 0.63                        | 1.0–500.0                            |
| Hispidulin            | $y = 0.025 \cdot x - 0.019$ | 0.9999 | $3.14 \cdot 10^{-3}$ | 0.41                        | 1.25                        | 1.5–500.0                            |
| Jaceosidin            | $y = 0.037 \cdot x - 0.039$ | 0.9999 | $4.19 \cdot 10^{-3}$ | 0.37                        | 1.14                        | 1.5–500.0                            |
| LDME                  | $y = 0.094 \cdot x - 0.060$ | 0.9999 | $8.45 \cdot 10^{-3}$ | 0.30                        | 0.90                        | 1.0–500.0                            |
| Eupatorin             | $y = 0.054 \cdot x - 0.075$ | 0.9999 | $6.82 \cdot 10^{-3}$ | 0.42                        | 1.26                        | 1.5–500.0                            |
| Acacetin              | $y = 0.065 \cdot x - 0.008$ | 0.9999 | $7.59 \cdot 10^{-3}$ | 0.39                        | 1.17                        | 1.5–500.0                            |
| Cirsimaritin          | $y = 0.027 \cdot x - 0.034$ | 0.9999 | $7.82 \cdot 10^{-3}$ | 0.96                        | 2.89                        | 3.0–500.0                            |

<sup>a</sup> Compounds: CQA – caffeoylquinic acid; dCQA – dicaffeoylquinic acid; tCQA – tricaffeoylquinic acid; LDME – luteolin-3',4'-dimethyl ether.

**Table S4.** Intra- and inter-day precision, repeatability, stability and recovery for 16 compounds.

| <b>Compound<sup>a</sup></b> | <b>Precision<br/>intra-day<br/>(RSD%)<br/>n=5</b> | <b>Precision<br/>inter-day<br/>(RSD%)<br/>n=4</b> | <b>Repeatability<br/>(RSD%)<br/>n=7</b> | <b>Stability<br/>(RSD%)<br/>n=7</b> | <b>Recovery<br/>(%)<br/>n=5</b> |
|-----------------------------|---------------------------------------------------|---------------------------------------------------|-----------------------------------------|-------------------------------------|---------------------------------|
| 4-CQA                       | 1.38                                              | 1.09                                              | 2.11                                    | 2.21                                | 97.73                           |
| 5-CQA                       | 1.44                                              | 1.22                                              | 2.34                                    | 1.63                                | 100.25                          |
| 3,4-dCQA                    | 1.72                                              | 1.70                                              | 1.88                                    | 1.84                                | 101.40                          |
| 3,5-dCQA                    | 2.01                                              | 2.16                                              | 1.94                                    | 1.96                                | 99.78                           |
| 4,5-dCQA                    | 2.2                                               | 2.31                                              | 1.77                                    | 1.57                                | 96.32                           |
| 3,4,5-tCQA                  | 1.96                                              | 1.89                                              | 1.12                                    | 1.44                                | 101.14                          |
| Vicenin-2                   | 1.83                                              | 1.90                                              | 1.20                                    | 2.02                                | 103.33                          |
| Isoorientin                 | 1.67                                              | 1.76                                              | 2.42                                    | 2.14                                | 102.17                          |
| Cynaroside                  | 1.71                                              | 1.34                                              | 2.40                                    | 2.10                                | 101.21                          |
| Apigenin                    | 1.90                                              | 1.55                                              | 1.53                                    | 2.33                                | 98.16                           |
| Hispidulin                  | 2.44                                              | 1.68                                              | 1.18                                    | 1.52                                | 99.45                           |
| Jaceosidin                  | 2.09                                              | 1.72                                              | 2.09                                    | 1.63                                | 97.89                           |
| LDME                        | 2.11                                              | 1.62                                              | 2.03                                    | 2.09                                | 104.01                          |
| Eupatorin                   | 1.23                                              | 1.26                                              | 2.44                                    | 2.37                                | 103.12                          |
| Acacetin                    | 1.78                                              | 1.29                                              | 1.65                                    | 1.98                                | 104.14                          |
| Cirsimaritin                | 1.65                                              | 2.04                                              | 1.79                                    | 1.97                                | 95.88                           |

<sup>a</sup> Compounds: CQA – caffeoylquinic acid; dCQA – dicaffeoylquinic acid; tCQA – tricaffeoylquinic acid; LDME – luteolin-3',4'-dimethyl ether.

**Table S5.** Content of selected caffeoylquinic acids and flavonoids in the 21 samples of *A. frigida* herb, mg/g dry plant weight

| Compound                        | Altai Krai |       | Buryatia Republic |       |       |       |       | Chita Oblast |       | Irkutsk Oblast |       |       | Krasnoyarsk Krai |       | Tyva Republic |       | Yakutia Republic |       |       |       |       |
|---------------------------------|------------|-------|-------------------|-------|-------|-------|-------|--------------|-------|----------------|-------|-------|------------------|-------|---------------|-------|------------------|-------|-------|-------|-------|
|                                 | A-01       | A-02  | A-03              | A-04  | A-05  | A-06  | A-07  | A-08         | A-09  | A-10           | A-11  | A-12  | A-13             | A-14  | A-15          | A-16  | A-17             | A-18  | A-19  | A-20  | A-21  |
| Caffeoylquinic acids            |            |       |                   |       |       |       |       |              |       |                |       |       |                  |       |               |       |                  |       |       |       |       |
| 4-O-Caffeoylquinic acid         | 0.33       | 0.26  | 0.27              | 0.29  | 0.35  | 0.42  | 0.44  | 0.51         | 0.22  | 0.39           | 0.11  | 0.10  | 0.25             | 0.20  | 1.16          | 1.84  | 0.20             | 0.12  | 0.18  | 0.10  | 0.10  |
| 5-O-Caffeoylquinic acid         | 16.29      | 17.22 | 12.25             | 11.37 | 12.39 | 16.84 | 16.52 | 6.19         | 5.25  | 12.46          | 12.03 | 11.17 | 15.24            | 14.67 | 15.37         | 15.94 | 9.27             | 6.12  | 6.97  | 5.06  | 2.11  |
| 3,4-Di-O-caffeoylquinic acid    | 0.94       | 0.67  | 0.60              | 0.52  | 0.63  | 0.79  | 0.82  | 1.64         | 1.53  | 0.60           | 0.68  | 1.63  | 1.11             | 2.54  | 0.92          | 0.52  | 3.84             | 3.60  | 2.15  | 2.09  | 1.04  |
| 3,5-Di-O-caffeoylquinic acid    | 14.37      | 12.61 | 17.15             | 16.22 | 19.14 | 23.10 | 24.20 | 17.44        | 15.27 | 18.26          | 21.12 | 22.57 | 14.06            | 16.37 | 12.63         | 10.08 | 23.41            | 24.55 | 22.91 | 21.50 | 14.25 |
| 4,5-Di-O-caffeoylquinic acid    | 1.75       | 1.70  | 1.71              | 0.94  | 1.95  | 2.86  | 2.73  | 2.28         | 1.92  | 2.63           | 2.54  | 3.11  | 1.63             | 2.11  | 0.94          | 0.95  | 3.52             | 4.63  | 4.58  | 3.11  | 2.39  |
| 3,4,5-Tri-O-caffeoylquinic acid | 2.18       | 2.39  | 3.06              | 3.11  | 4.16  | 5.63  | 5.92  | 5.74         | 5.06  | 5.11           | 5.56  | 6.16  | 2.01             | 2.53  | 0.97          | 0.87  | 7.14             | 9.83  | 11.68 | 12.35 | 12.09 |
| Subtotal caffeoylquinic acids   | 35.86      | 34.85 | 35.04             | 32.45 | 38.62 | 49.64 | 50.63 | 33.80        | 29.25 | 39.45          | 42.04 | 44.74 | 34.30            | 38.42 | 31.99         | 30.20 | 47.38            | 48.85 | 48.47 | 44.21 | 31.98 |
| Flavonoid glycosides            |            |       |                   |       |       |       |       |              |       |                |       |       |                  |       |               |       |                  |       |       |       |       |
| Vicenin-2                       | 2.11       | 1.63  | 1.26              | 1.20  | 1.06  | 2.25  | 1.85  | 1.09         | 0.63  | 1.27           | 1.09  | 0.54  | 2.00             | 1.52  | 1.93          | 2.39  | 0.37             | 0.21  | 0.20  | 0.15  | 0.10  |
| Isoorientin                     | 1.92       | 1.54  | 2.34              | 2.14  | 3.14  | 1.82  | 1.82  | 2.33         | 2.16  | 3.54           | 2.11  | 2.08  | 1.63             | 1.40  | 2.16          | 2.92  | 2.11             | 2.14  | 1.75  | 1.09  | 0.70  |
| Cynaroside                      | 0.37       | 0.32  | 0.21              | 0.10  | 0.27  | 0.25  | 0.24  | 0.55         | 0.29  | 0.36           | 0.32  | 0.35  | 0.35             | 0.26  | 0.54          | 0.69  | 0.21             | 0.27  | 0.14  | 0.10  | 0.12  |
| Subtotal flavonoid glycosides   | 4.40       | 3.49  | 3.81              | 3.44  | 4.47  | 4.32  | 3.91  | 3.97         | 3.08  | 5.17           | 3.52  | 2.97  | 3.98             | 3.18  | 4.63          | 6.00  | 2.69             | 2.63  | 2.09  | 1.34  | 0.92  |
| Flavonoid aglycones             |            |       |                   |       |       |       |       |              |       |                |       |       |                  |       |               |       |                  |       |       |       |       |
| Apigenin                        | 0.10       | 0.12  | 0.25              | 0.11  | 0.31  | 0.25  | 0.20  | 0.05         | 0.09  | 0.30           | 0.11  | 0.10  | 0.12             | 0.10  | 0.29          | 0.34  | 0.10             | 0.12  | 0.10  | 0.10  | 0.14  |
| Hispidulin                      | 0.11       | 0.10  | 0.28              | 0.14  | 0.30  | 0.32  | 0.40  | 0.58         | 0.63  | 0.42           | 0.54  | 0.82  | 0.10             | 0.12  | 0.32          | 0.31  | 0.99             | 1.16  | 1.22  | 1.18  | 0.94  |
| Jaceosidine                     | 0.84       | 0.86  | 1.54              | 1.27  | 1.87  | 2.84  | 3.52  | 2.59         | 2.67  | 1.67           | 2.63  | 3.64  | 0.85             | 1.34  | 0.74          | 0.51  | 3.29             | 5.15  | 4.74  | 6.69  | 6.67  |
| Luteolin-3',4'-dimethyl ether   | 0.24       | 0.11  | 0.57              | 0.50  | 0.63  | 1.12  | 1.06  | 0.26         | 0.14  | 0.79           | 1.35  | 1.84  | 0.64             | 0.72  | 0.14          | 0.10  | 2.04             | 2.63  | 3.11  | 3.52  | 4.18  |
| Eupatorin                       | 0.33       | 0.35  | 0.87              | 0.56  | 0.74  | 0.84  | 0.80  | 0.85         | 0.73  | 0.84           | 1.12  | 1.52  | 0.35             | 0.47  | 0.35          | 0.16  | 1.62             | 1.14  | 2.84  | 2.80  | 3.18  |
| Acacetin                        | 0.11       | 0.10  | 0.25              | 0.34  | 0.20  | 0.36  | 0.54  | 0.10         | 0.11  | 0.25           | 0.42  | 0.49  | 0.10             | 0.14  | 0.10          | 0.11  | 0.30             | 0.35  | 0.46  | 0.54  | 0.50  |
| Cirsimaritin                    | 0.71       | 0.74  | 2.99              | 2.36  | 3.26  | 4.73  | 5.13  | 1.26         | 1.38  | 4.34           | 4.84  | 7.22  | 1.06             | 2.18  | 0.97          | 0.34  | 6.39             | 7.89  | 9.18  | 12.31 | 17.71 |
| Subtotal flavonoid aglycones    | 2.44       | 2.38  | 6.75              | 5.28  | 7.31  | 10.46 | 16.65 | 5.69         | 5.75  | 8.61           | 11.01 | 15.63 | 3.22             | 5.07  | 2.91          | 1.87  | 14.73            | 18.44 | 21.65 | 27.14 | 33.32 |
| Total flavonoids                | 6.84       | 5.87  | 10.56             | 8.72  | 11.78 | 14.78 | 20.56 | 9.66         | 8.83  | 13.78          | 14.53 | 18.60 | 7.20             | 8.25  | 7.54          | 7.87  | 17.42            | 21.07 | 23.74 | 28.48 | 34.24 |
| Total phenolics                 | 42.70      | 40.72 | 45.60             | 41.17 | 50.40 | 64.42 | 66.19 | 43.46        | 38.08 | 53.23          | 56.57 | 63.34 | 41.50            | 46.67 | 39.47         | 38.07 | 64.80            | 69.91 | 72.21 | 72.69 | 66.22 |

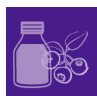**Table S6.** Macronutrients, free sugars, organic acids, amino acids and mineral composition of *A. frigida* herbal tea.

| Parameter                                         | Sagaan aya tea |
|---------------------------------------------------|----------------|
| Macronutrients                                    |                |
|                                                   | mg/100 mL      |
| Carbohydrates                                     | 127.63 ± 2.55  |
| Protein                                           | 31.12 ± 0.62   |
| Lipids                                            | 8.60 ± 0.17    |
| Ash                                               | 5.39 ± 0.21    |
| Free sugars                                       |                |
|                                                   | mg/100 mL      |
| Glucose                                           | 22.64 ± 0.45   |
| Fructose                                          | 7.54 ± 0.14    |
| Sucrose                                           | 28.25 ± 0.52   |
| Total free sugars                                 | 58.43          |
| Organic acids                                     |                |
|                                                   | mg/100 mL      |
| Citric acid                                       | 8.16 ± 0.15    |
| Malic acid                                        | 14.02 ± 0.24   |
| Oxalic acid                                       | 0.16 ± 0.00    |
| Succinic acid                                     | traces         |
| Tartaric acid                                     | traces         |
| Total organic acids                               | 22.34          |
| Amino acids                                       |                |
| Essential proteinogenic amino acids               |                |
|                                                   | mg/100 mL      |
| Histidine                                         | 0.21 ± 0.00    |
| Isoleucine                                        | 0.26 ± 0.00    |
| Leucine                                           | 0.08 ± 0.00    |
| Lysine                                            | 0.14 ± 0.00    |
| Metionine                                         | 0.51 ± 0.01    |
| Phenylalanine                                     | 0.22 ± 0.00    |
| Treonine                                          | 0.34 ± 0.00    |
| Tryptophane                                       | 0.09 ± 0.00    |
| Valine                                            | 0.61 ± 0.01    |
| Subtotal                                          | 2.46           |
| Conditionally essential proteinogenic amino acids |                |
| Arginine                                          | 0.47 ± 0.01    |
| Cysteine                                          | 0.04 ± 0.00    |
| Glutamine                                         | 0.07 ± 0.00    |
| Glycine                                           | 0.12 ± 0.00    |
| Proline                                           | 10.63 ± 0.21   |
| Tyrosine                                          | 0.24 ± 0.00    |
| Subtotal                                          | 11.57          |
| Non-essential proteinogenic amino acids           |                |
| Alanine                                           | 0.52 ± 0.01    |
| Aspartic acid                                     | 0.27 ± 0.00    |
| Asparagine                                        | 2.87 ± 0.05    |
| Glutamic acid                                     | 5.14 ± 0.11    |
| Serine                                            | 0.53 ± 0.01    |
| Subtotal                                          | 9.33           |
| Non-essential non-proteinogenic amino acids       |                |
| γ-Aminobutyric acid                               | 0.60 ± 0.01    |
| 4-Hydroxyproline                                  | 0.11 ± 0.00    |
| Subtotal                                          | 0.72           |
| Total amino acids                                 | 24.08          |
| Minerals                                          |                |
|                                                   | µg/100 mL      |
| Calcium                                           | 627.18         |
| Chromium                                          | 0.02           |
| Cobalt                                            | 0.01           |
| Copper                                            | 52.37          |
| Iron                                              | 124.23         |
| Magnesium                                         | 163.10         |
| Manganese                                         | 6.25           |
| Molybdenum                                        | traces         |
| Nickel                                            | traces         |
| Potassium                                         | 2359.37        |
| Selenium                                          | 0.11           |
| Sodium                                            | 68.27          |
| Zinc                                              | 1.42           |



**Table S7.** Demographic information of participants of tea sensory evaluation.

| <b>Index</b> | <b>Percentage (n)</b> |
|--------------|-----------------------|
| Gender       |                       |
| male         | 40 (12)               |
| female       | 60 (18)               |
| Age          |                       |
| 18–30        | 63 (19)               |
| 30–40        | 30 (9)                |
| > 40         | 7 (2)                 |

**Table S8.** Sensory evaluation data of *A. frigida* herbal tea, green tea, black tea and *Artemisia absinthium* tea.

| <b>Index</b>         | <b><i>A. frigida</i><br/>herbal tea</b> | <b>Green tea</b> | <b>Black tea</b> | <b><i>Artemisia absinthium</i> tea</b> |
|----------------------|-----------------------------------------|------------------|------------------|----------------------------------------|
| Color acceptability  | 7.5 ± 1.2                               | 7.2 ± 1.0        | 8.6 ± 0.9        | 7.1 ± 0.4                              |
| Flavor acceptability | 7.4 ± 1.4                               | 7.6 ± 1.0        | 9.1 ± 1.0        | 3.6 ± 0.3                              |
| Saltiness            | 5.3 ± 0.8                               | 5.1 ± 0.7        | 5.4 ± 0.6        | 5.1 ± 0.4                              |
| Bitterness           | 6.3 ± 0.9                               | 5.8 ± 0.5        | 6.1 ± 0.4        | 2.0 ± 0.0                              |
| Sourness             | 4.6 ± 0.9                               | 5.1 ± 0.6        | 5.6 ± 0.6        | 4.8 ± 0.4                              |
| Astringency          | 6.2 ± 1.1                               | 7.3 ± 0.8        | 8.1 ± 0.8        | 3.6 ± 0.5                              |
| Sweetness            | 5.1 ± 0.4                               | 5.1 ± 0.7        | 5.3 ± 0.4        | 4.9 ± 0.4                              |
| Overall preferences  | 6.9 ± 0.8                               | 7.1 ± 1.0        | 7.3 ± 0.8        | 2.1 ± 0.1                              |

Preference scale ranged from 0 (greatest imaginary dislike) to 10 (greatest imaginary like).

**Table S9.** Phytochemical composition of *A. frigida* herbal tea.

| <b>Parameter</b>              | <b>Sagaan aya tea, mg/100 mL</b> |
|-------------------------------|----------------------------------|
| Phenylpropanoids              | 42.18 ± 0.84                     |
| Flavonoids                    | 4.63 ± 0.09                      |
| Coumarins                     | traces                           |
| Anthocyanidins                | not detected                     |
| Tannins                       | not detected                     |
| Iridoids                      | not detected                     |
| Essential oil                 | traces                           |
| Water soluble polysaccharides | 24.11 ± 0.48                     |
| Alkaloids                     | not detected                     |

**Figure S1.** Mass spectra of compounds 1–59, found in *A. frigida*.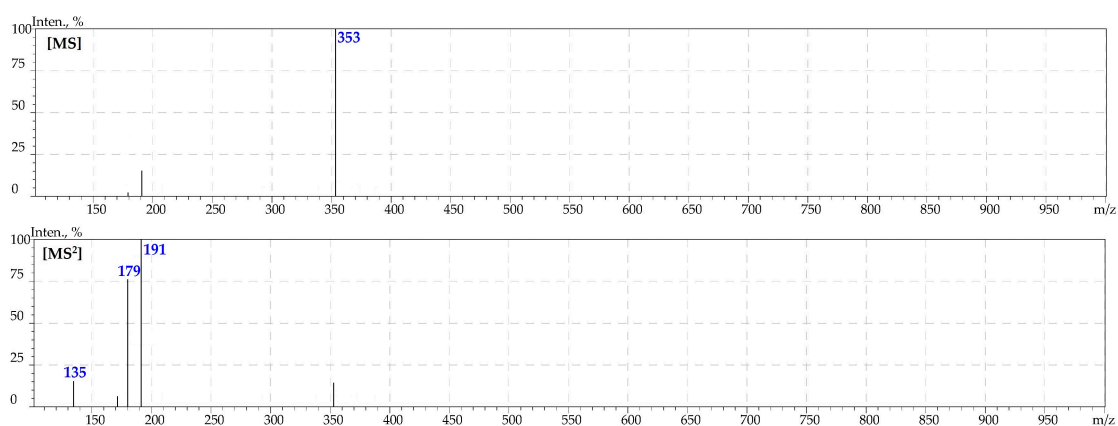**Figure S1-01.** MS and MS<sup>2</sup> spectra of 1-O-caffeoylquinic acid (compound 1).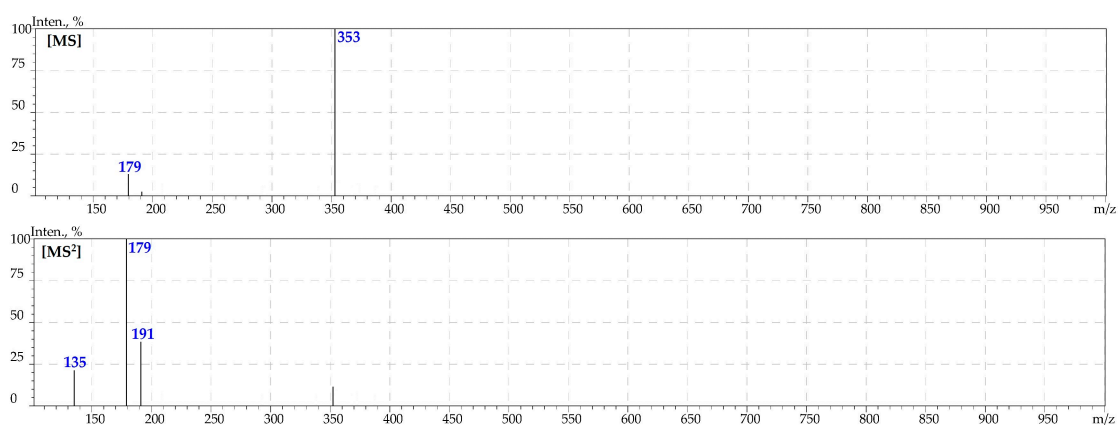**Figure S1-02.** MS and MS<sup>2</sup> spectra of 4-O-caffeoylquinic acid (compound 2).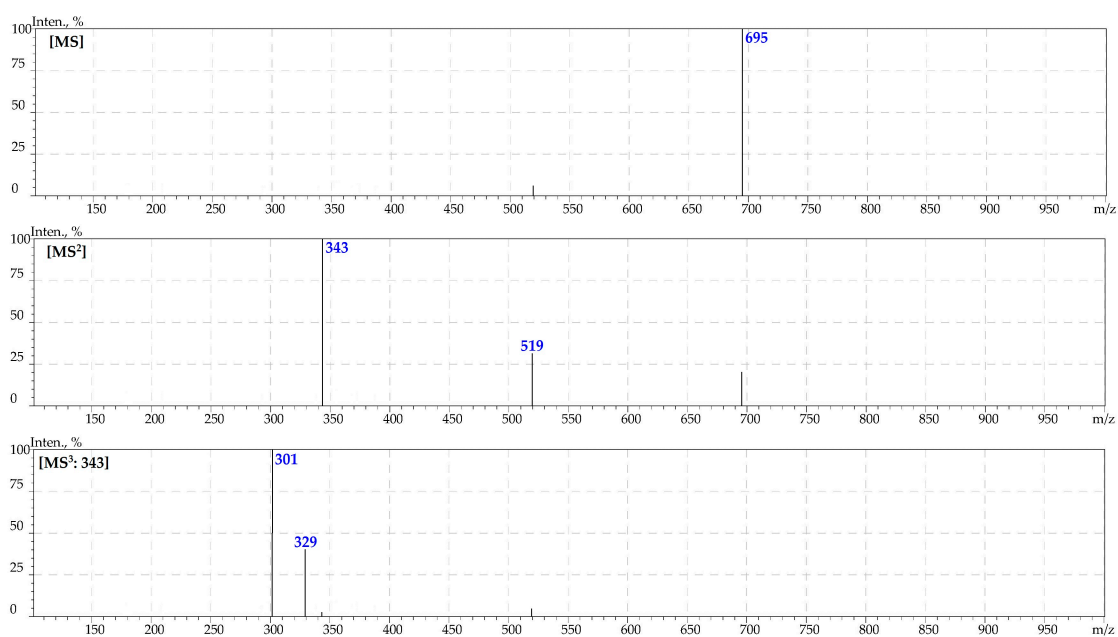**Figure S1-03.** MS, MS<sup>2</sup> and MS<sup>3</sup> spectra of friginoside B (compound 3; tentatively 5,7-dihydroxy-3',4',5'-trimethoxyflavone-7-O-(2''-O-glucuronyl)glucuronide).

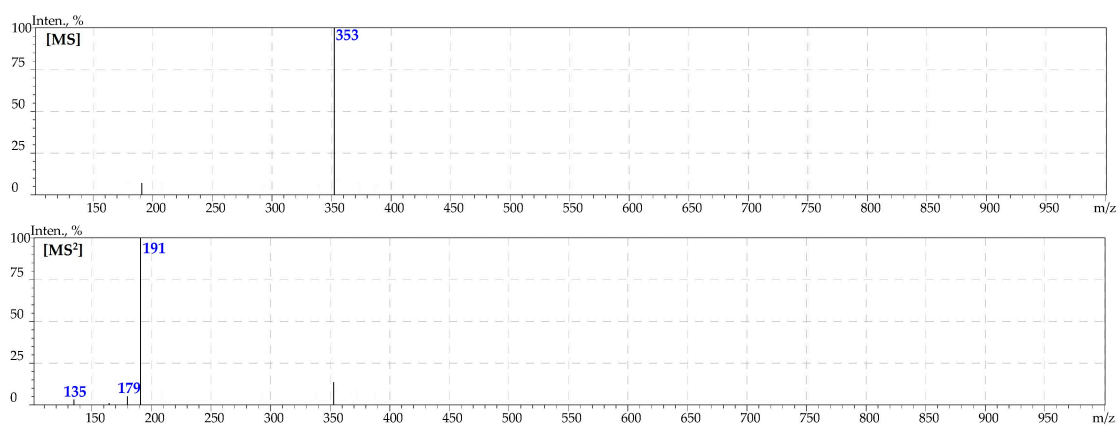

Figure S1-04. MS and MS<sup>2</sup> spectra of 5-O-caffeoylquinic acid (compound 4).

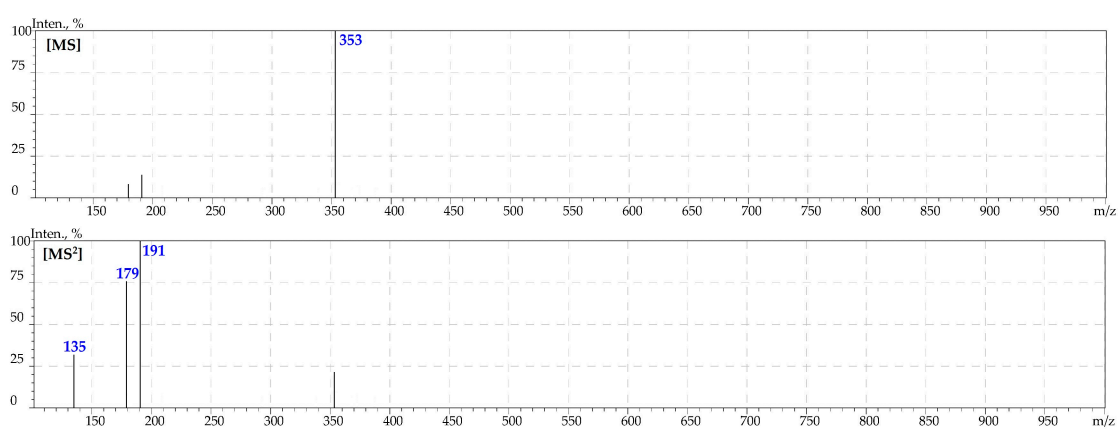

Figure S1-05. MS and MS<sup>2</sup> spectra of 3-O-caffeoylquinic acid (compound 5).

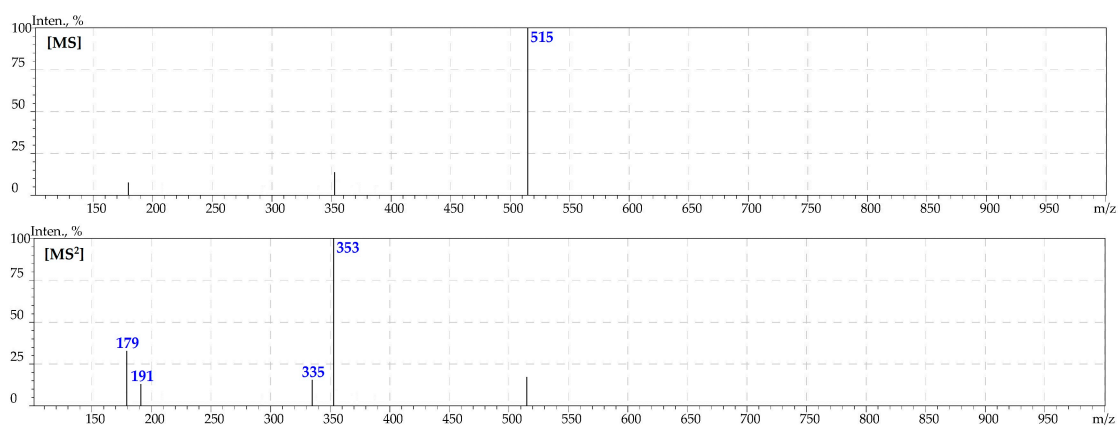

Figure S1-06. MS and MS<sup>2</sup> spectra of 1,3-di-O-caffeoylquinic acid (compound 6).

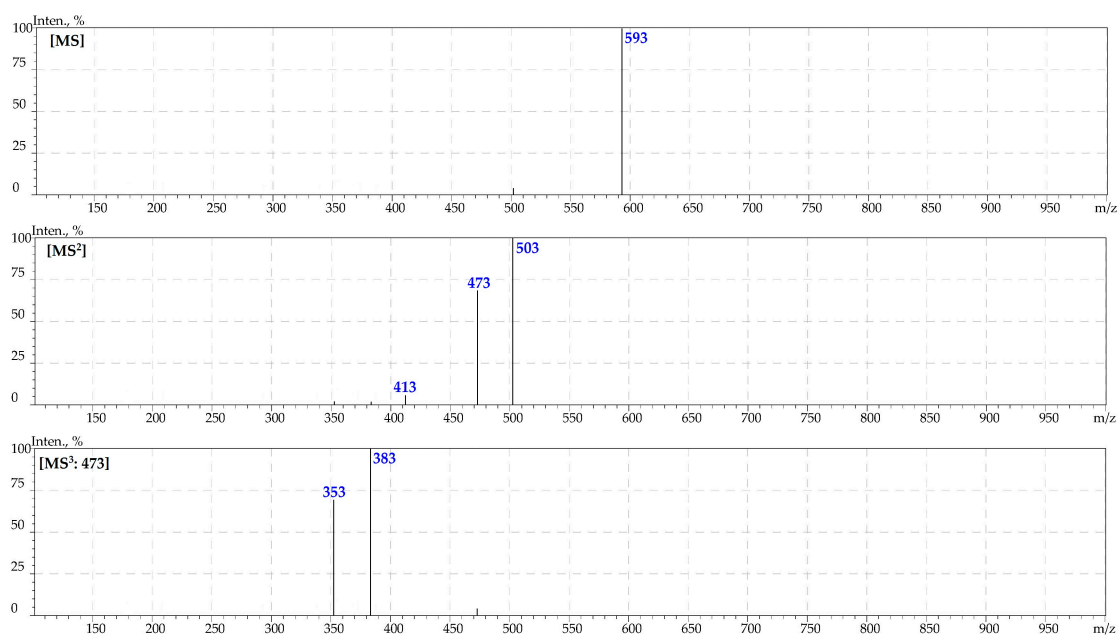

Figure S1-07. MS, MS<sup>2</sup> and MS<sup>3</sup> spectra of vicenin-2 (compound 7; apigenin-6,8-di-C-glucoside).

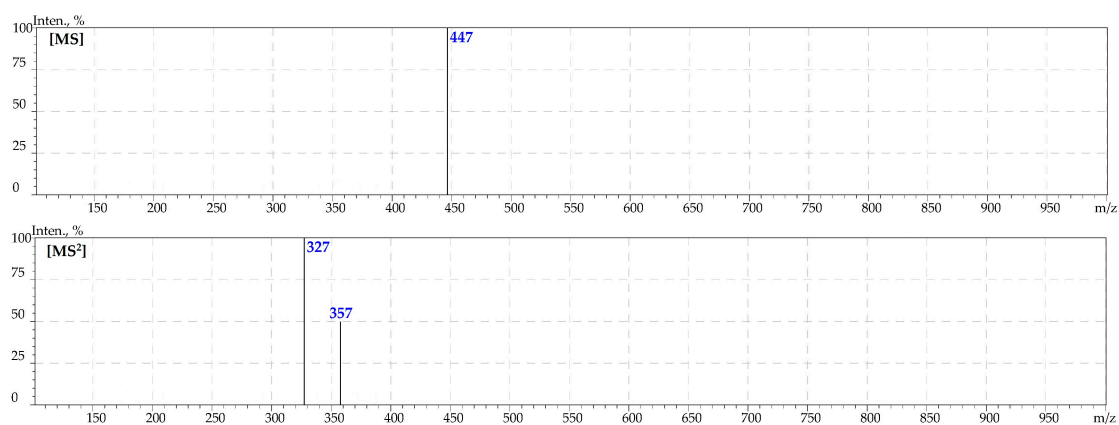

Figure S1-08. MS and MS<sup>2</sup> spectra of isororientin (compound 8; luteolin-6-C-glucoside).

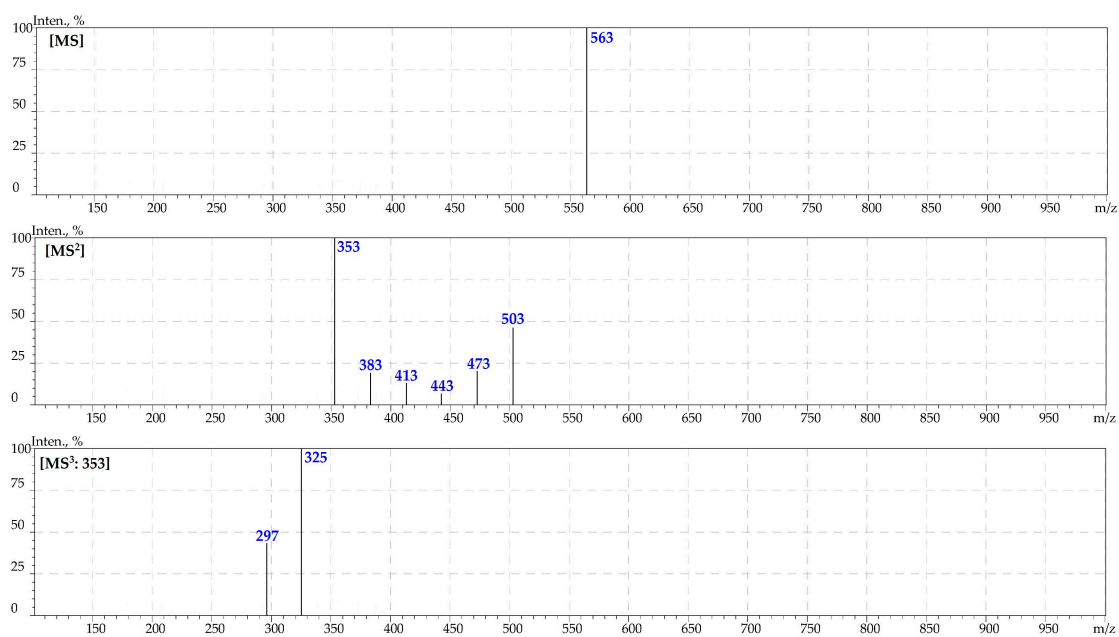

**Figure S1-09.** MS, MS<sup>2</sup> and MS<sup>3</sup> spectra of isoschaftoside (compound 9; apigenin-6-C-arabinoside-8-C-glucoside).

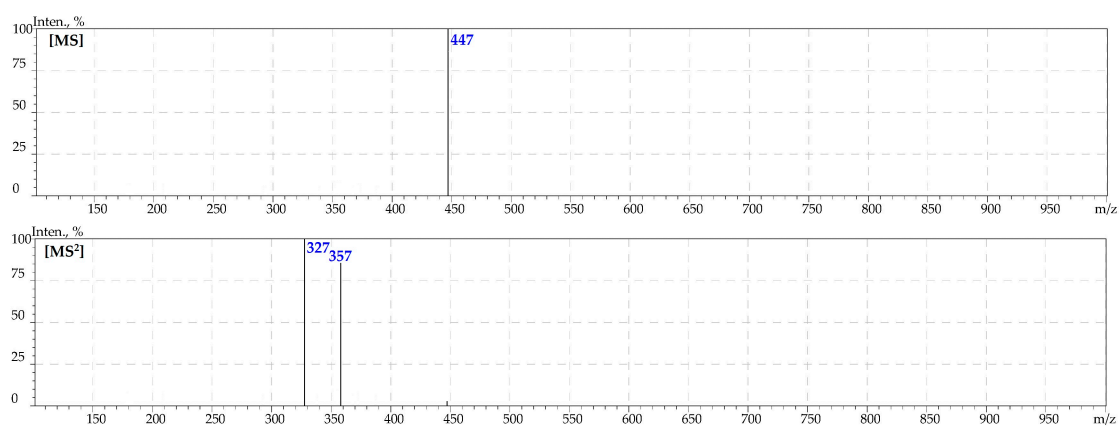

**Figure S1-10.** MS and MS<sup>2</sup> spectra of orientin (compound 10; luteolin-8-C-glucoside).

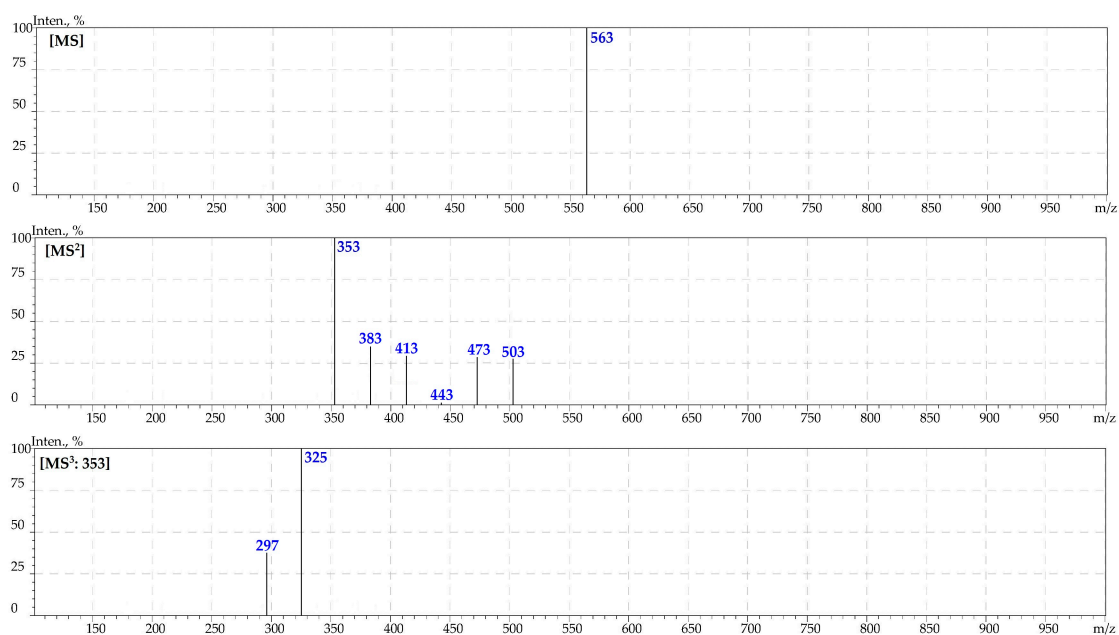

**Figure S1-11.** MS, MS<sup>2</sup> and MS<sup>3</sup> spectra of schaftoside (compound 11; apigenin-6-C-glucoside-8-C-arabinoside).

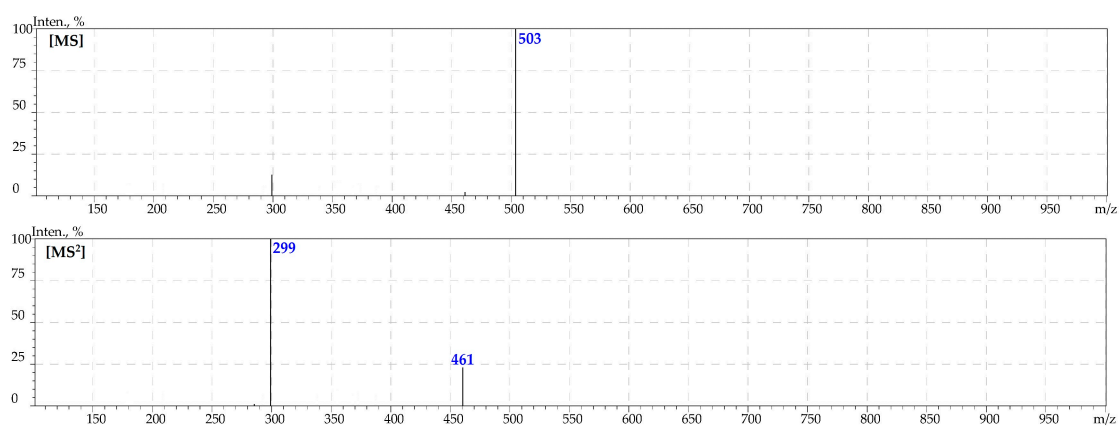

**Figure S1-12.** MS and MS<sup>2</sup> spectra of chrysoeriol-O-acetyl-hexoside (compound 12).

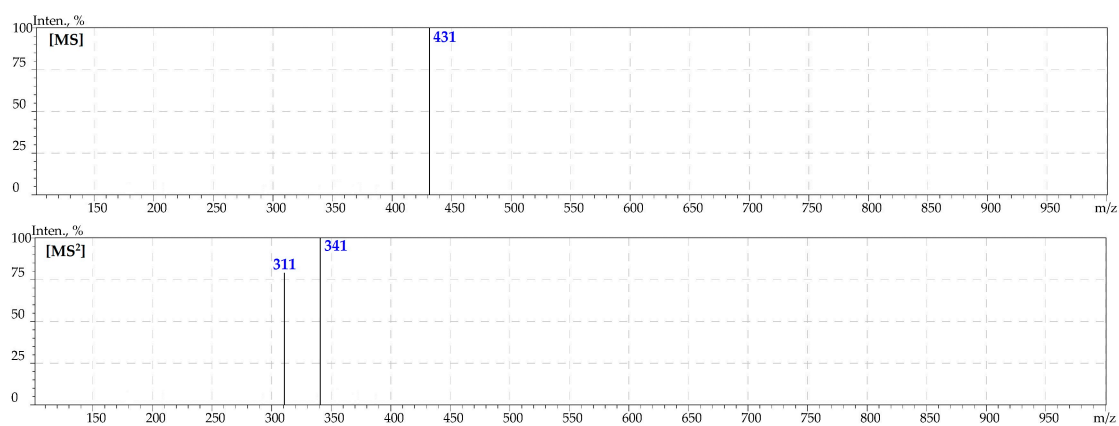

**Figure S1-13.** MS and MS<sup>2</sup> spectra of vitexin (compound 13; apigenin-8-C-glucoside).



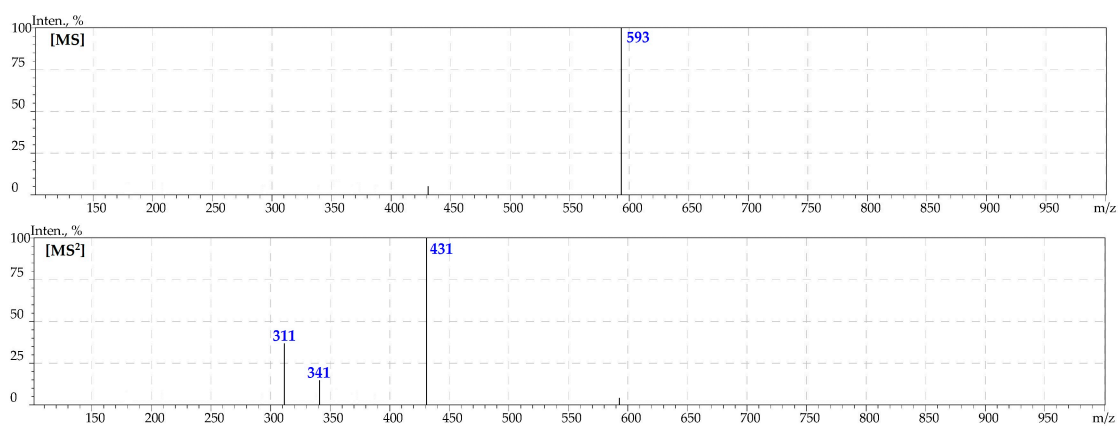

**Figure S1-14.** MS and MS<sup>2</sup> spectra of apigenin-C-hexoside-O-hexoside (compound 14).

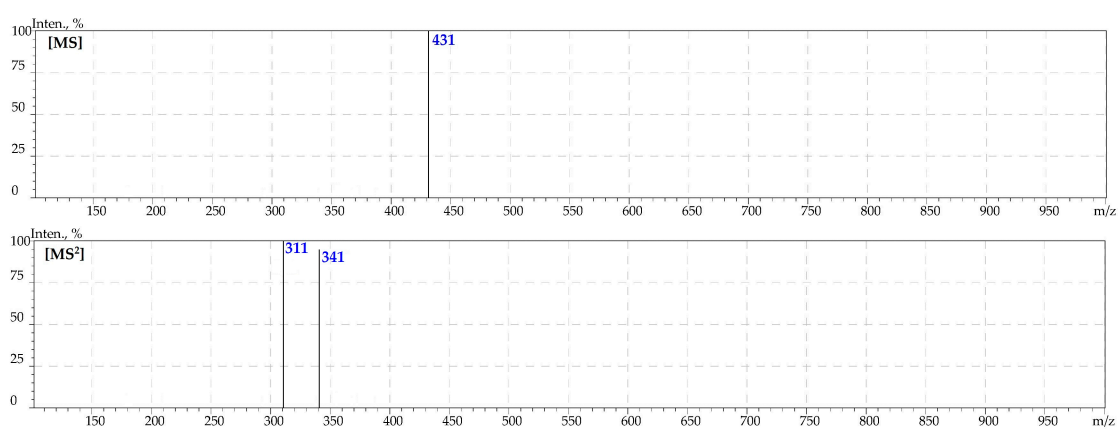

**Figure S1-15.** MS and MS<sup>2</sup> spectra of isovitexin (compound 15; apigenin-6-C-glucoside).

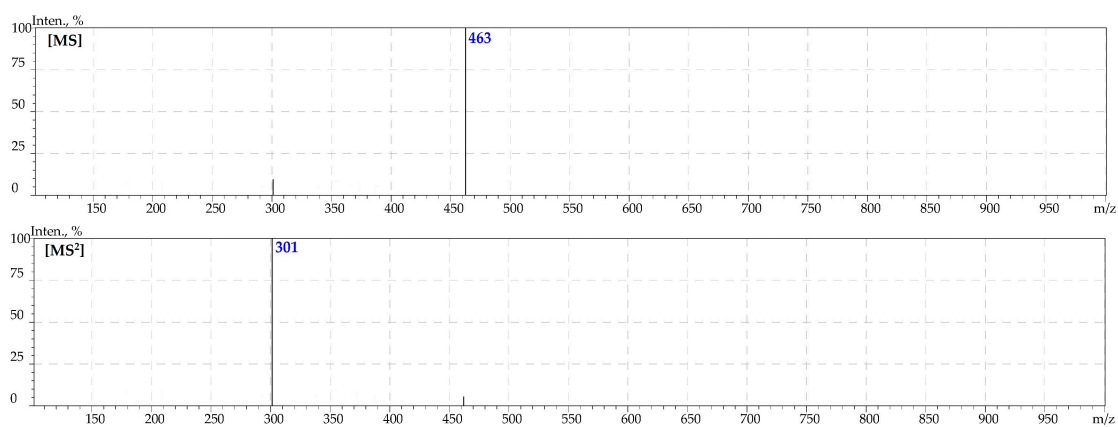

**Figure S1-16.** MS and MS<sup>2</sup> spectra of 6-hydroxyluteolin-7-O-glucoside (compound 16).

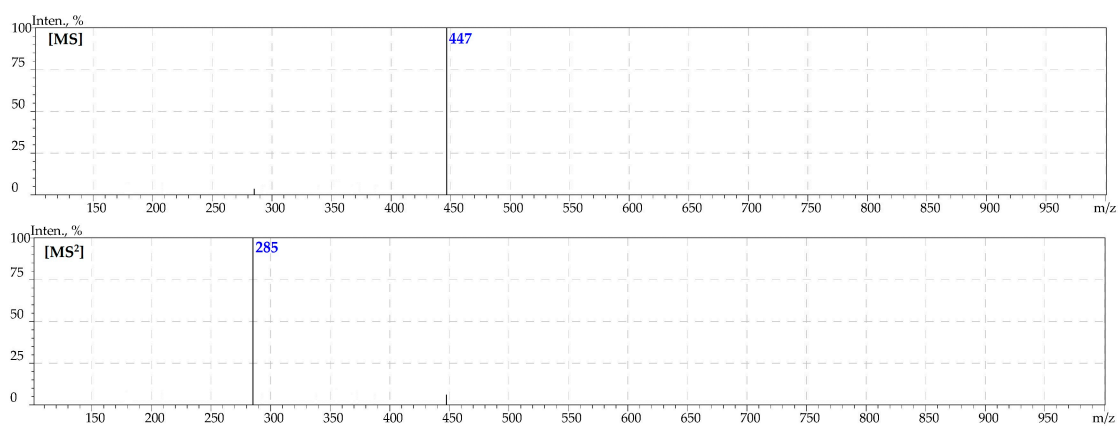

Figure S1-17. MS and MS<sup>2</sup> spectra of cynaroside (compound 17; luteolin-7-O-glucoside).

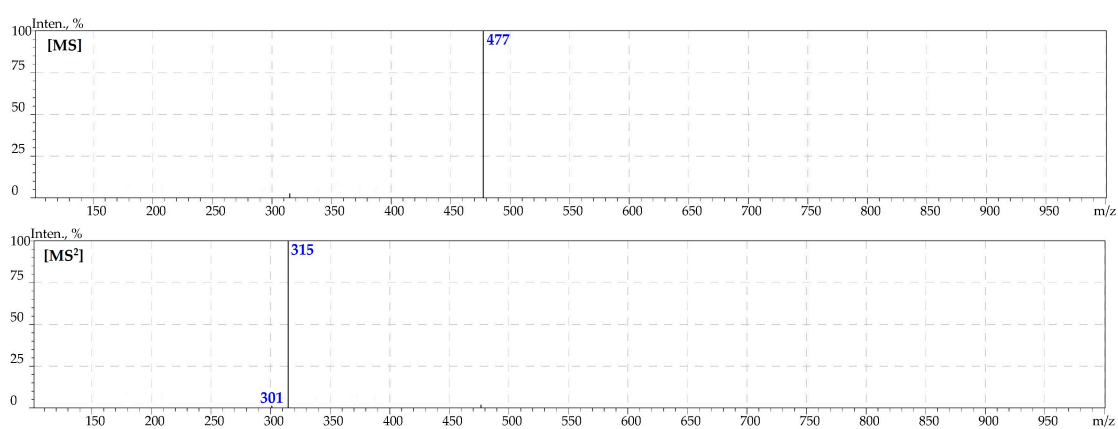

Figure S1-18. MS and MS<sup>2</sup> spectra of nepitrin (compound 18; nepetin-7-O-glucoside).

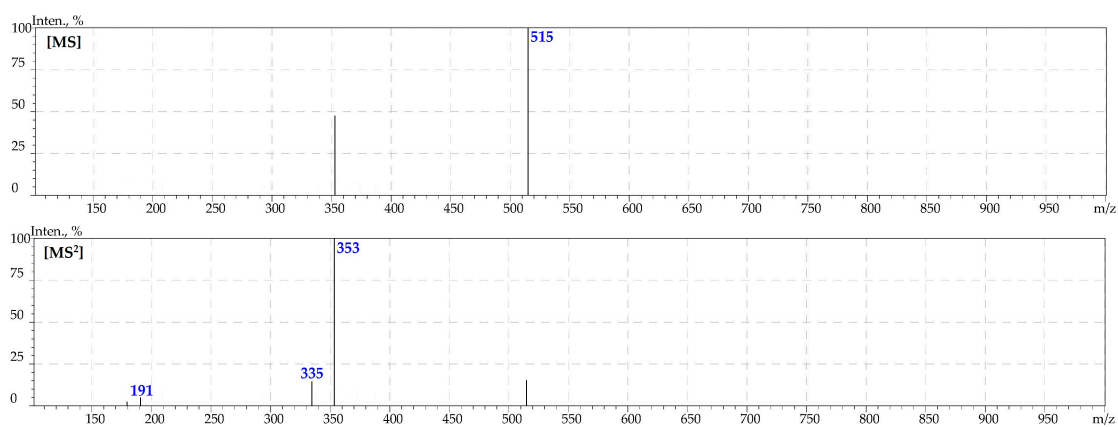

Figure S1-19. MS and MS<sup>2</sup> spectra of 3,4-di-O-caffeoylquinic acid (compound 19).

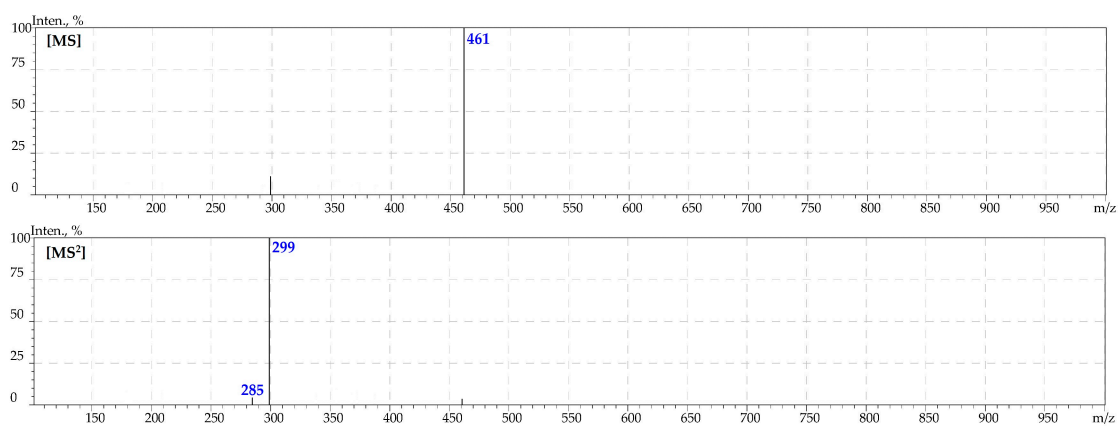

Figure S1-20. MS and MS<sup>2</sup> spectra of diosmetin-7-O-glucoside (compound 20).

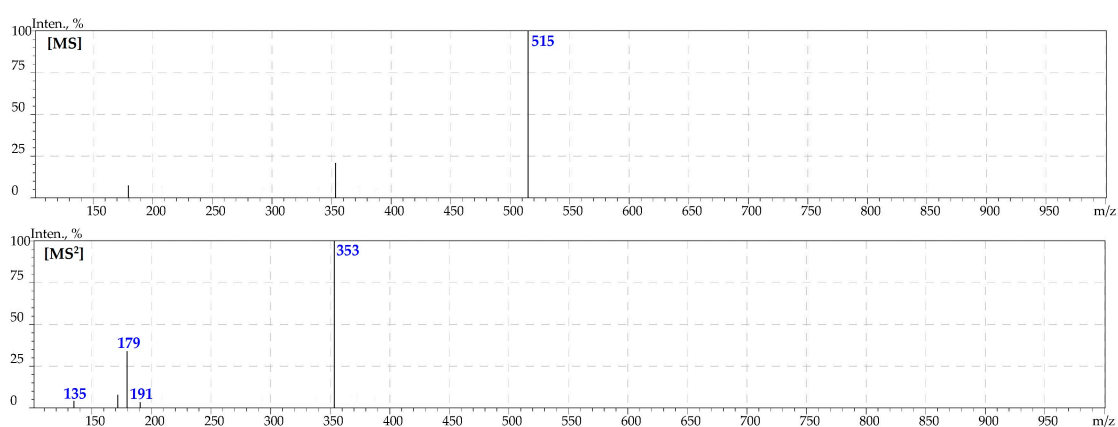

Figure S1-21. MS and MS<sup>2</sup> spectra of 3,5-di-O-caffeoylquinic acid (compound 21).

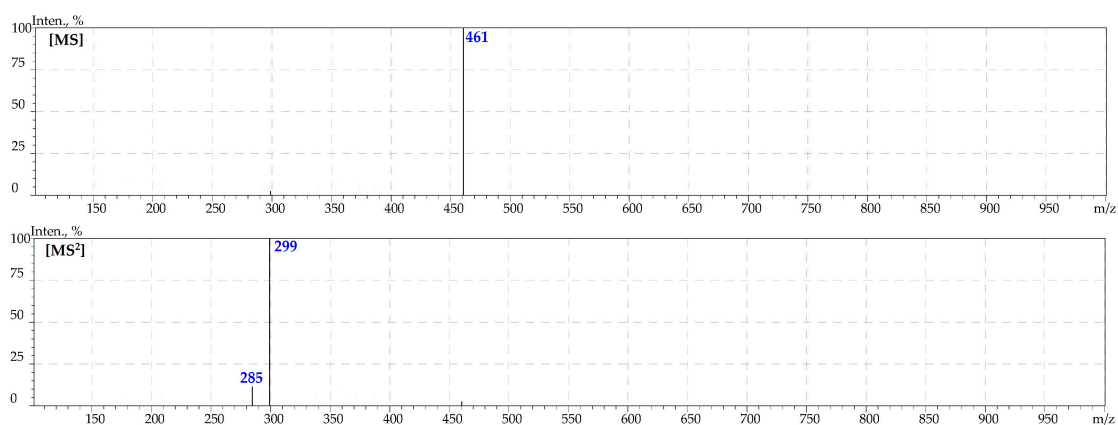

Figure S1-22. MS and MS<sup>2</sup> spectra of thermopsoside (compound 22; chrysoeriol-7-O-glucoside).

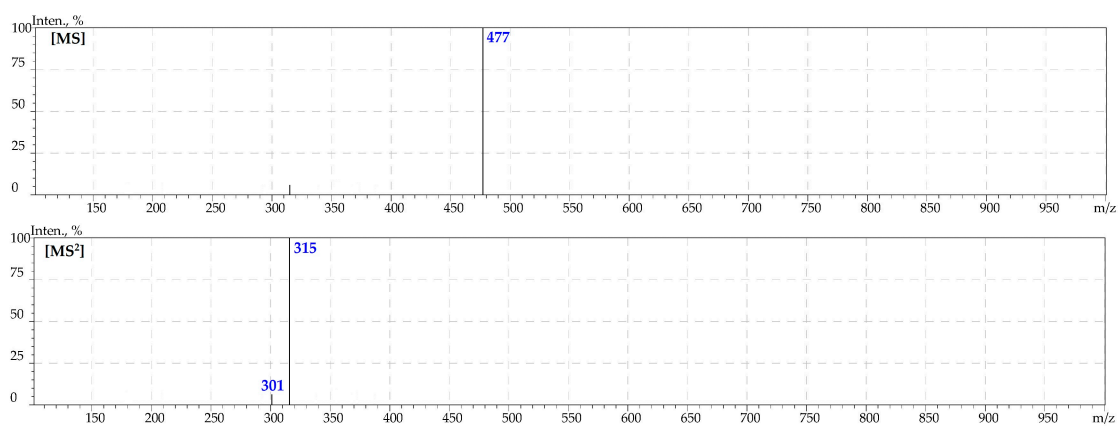

Figure S1-23. MS and MS<sup>2</sup> spectra of rhaunoside F (compound 23; nepetin-3'-O-glucoside).

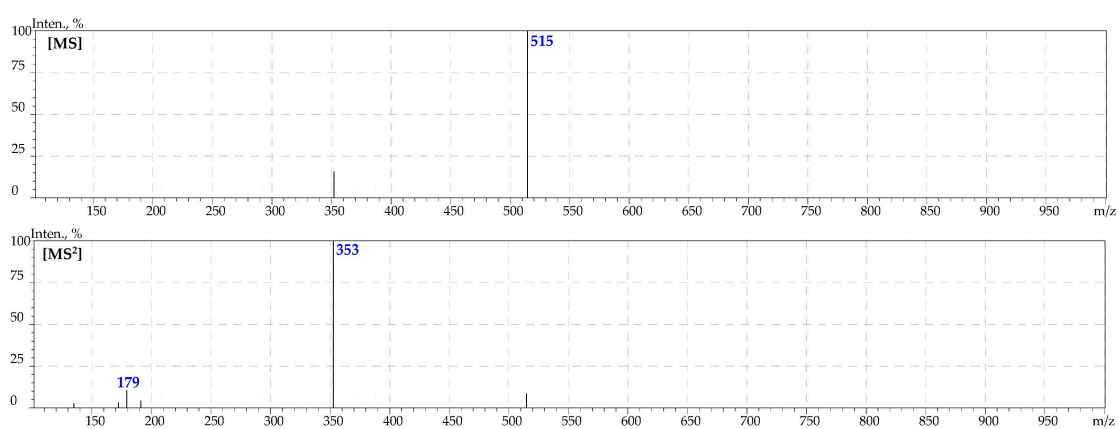

Figure S1-24. MS and MS<sup>2</sup> spectra of 4,5-di-O-caffeoylquinic acid (compound 24).

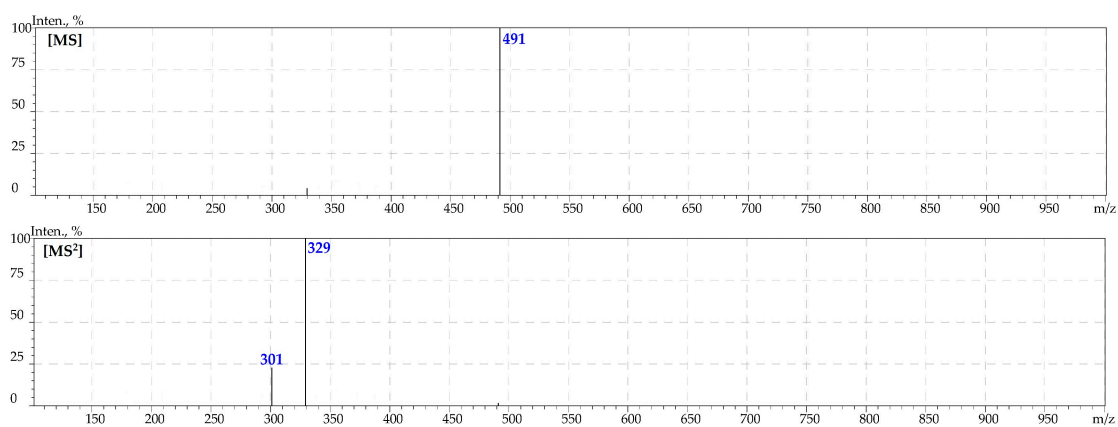

Figure S1-25. MS and MS<sup>2</sup> spectra of 6-hydroxyluteolin-dimethyl ether-O-hexoside (compound 25).

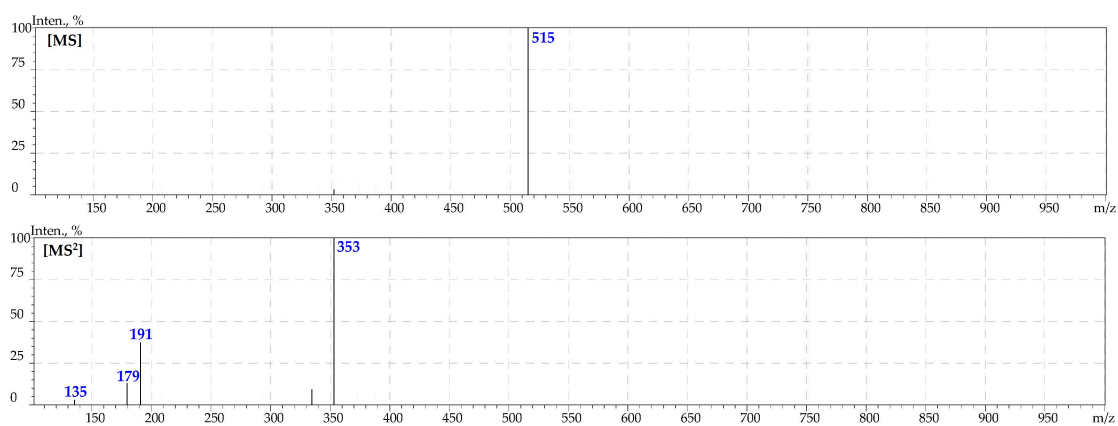

Figure S1-26. MS and MS<sup>2</sup> spectra of 1,5-di-O-caffeoylquinic acid (compound 26).

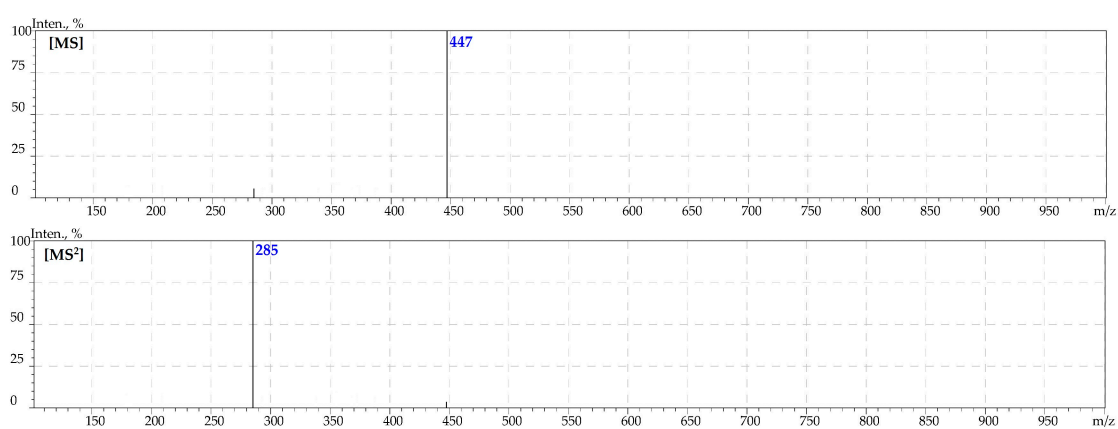

Figure S1-27. MS and MS<sup>2</sup> spectra of luteolin-4'-O-glucoside (compound 27).

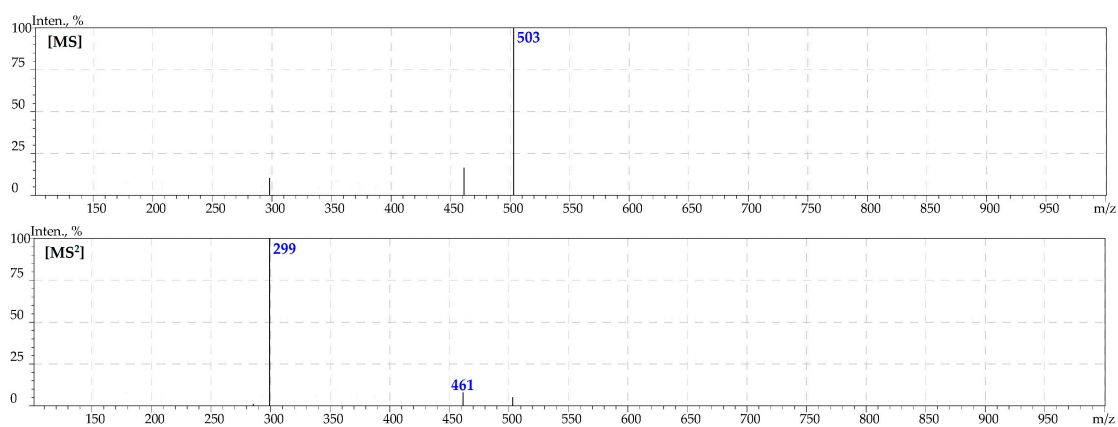

Figure S1-28. MS and MS<sup>2</sup> spectra of chrysoeriol-O-acetyl-hexoside (compound 28).

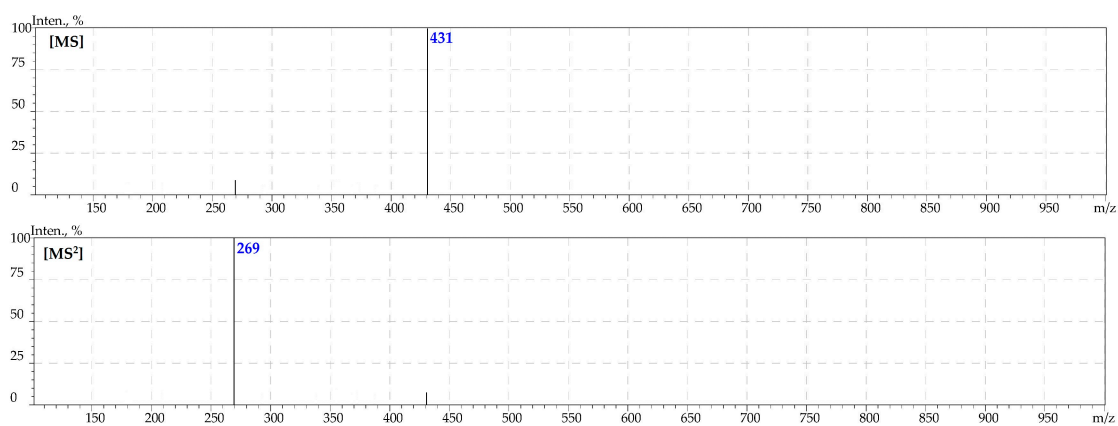

Figure S1-29. MS and MS<sup>2</sup> spectra of cosmosiin (compound 29; apigenin-7-O-glucoside).

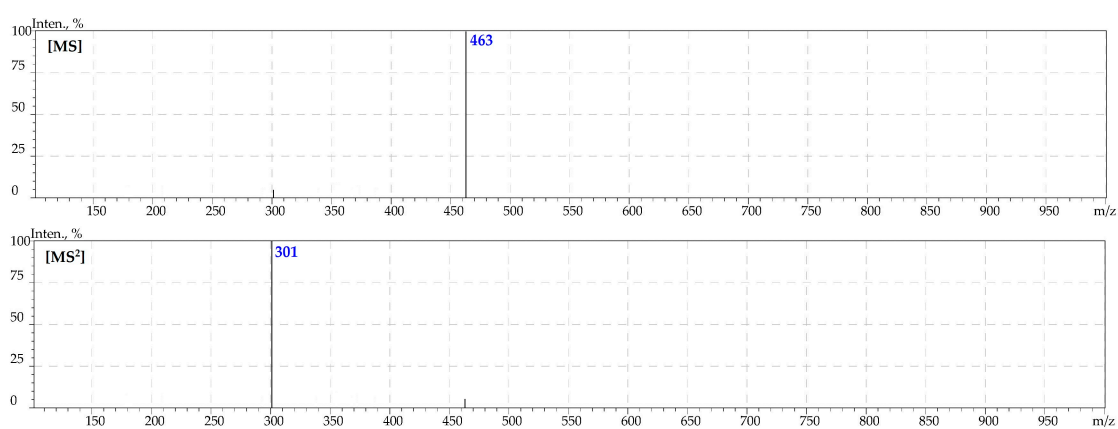

Figure S1-30. MS and MS<sup>2</sup> spectra of 6-hydroxyluteolin-3'-O-glucoside (compound 30; tentative).

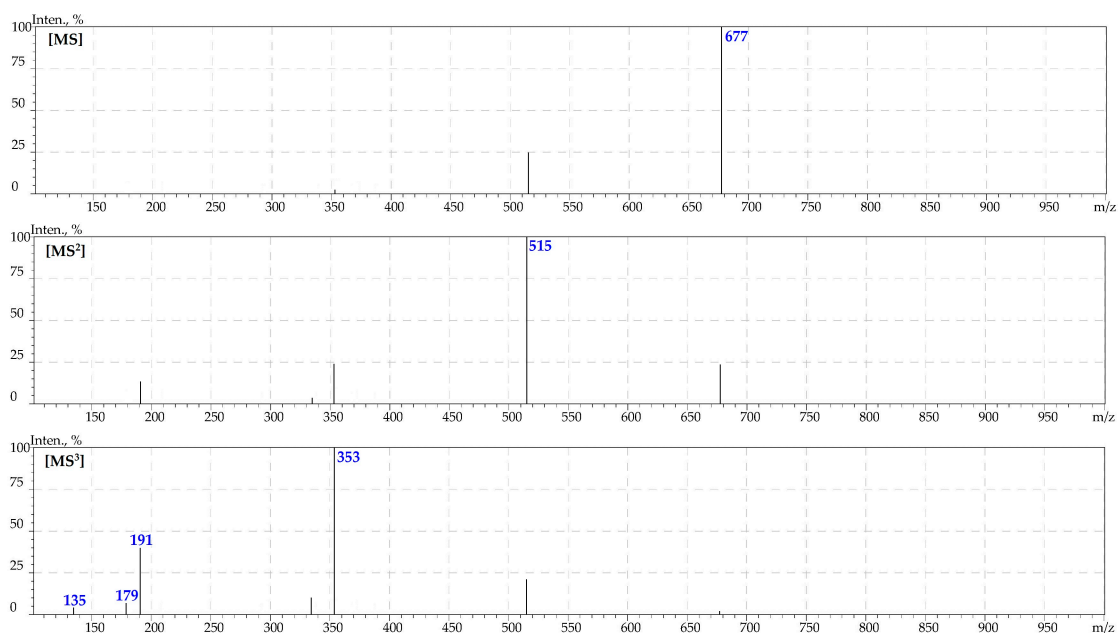

Figure S1-31. MS, MS<sup>2</sup> and MS<sup>3</sup> spectra of 1,3,5-tri-O-caffeoylquinic acid (compound 31).

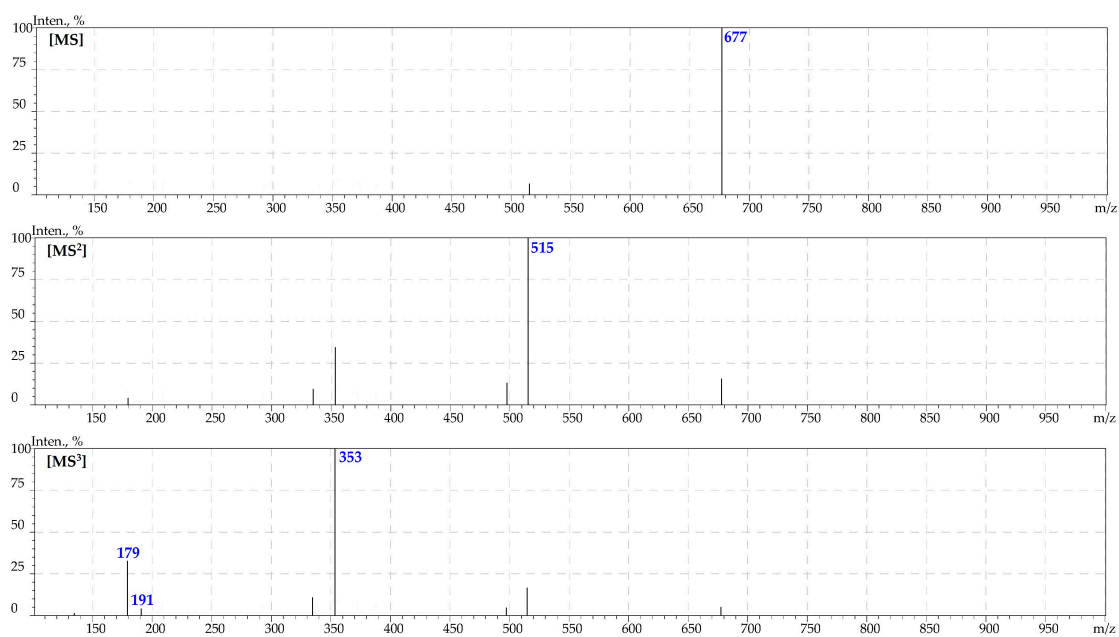

Figure S1-32. MS, MS<sup>2</sup> and MS<sup>3</sup> spectra of 1,4,5-tri-O-caffeoylquinic acid (compound 32).

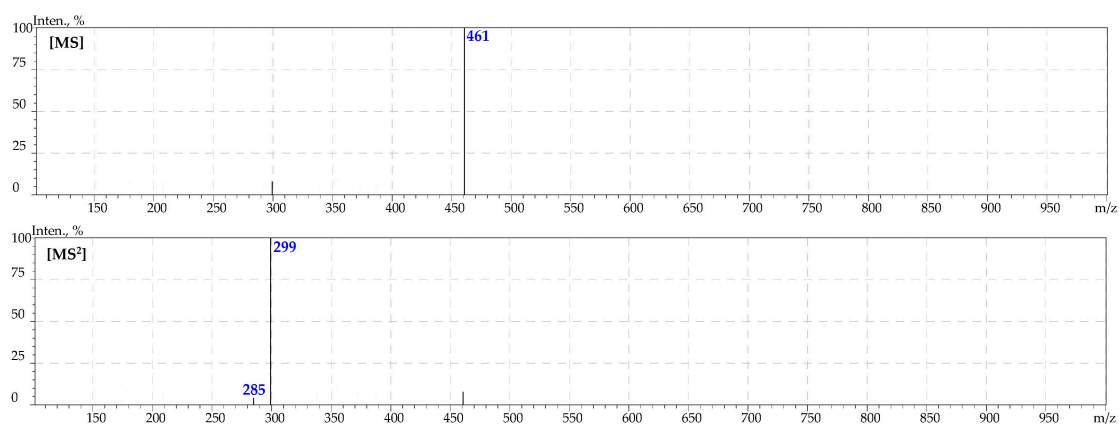

Figure S1-33. MS and MS<sup>2</sup> spectra of chrysoeriol-4'-O-glucoside (compound 33).

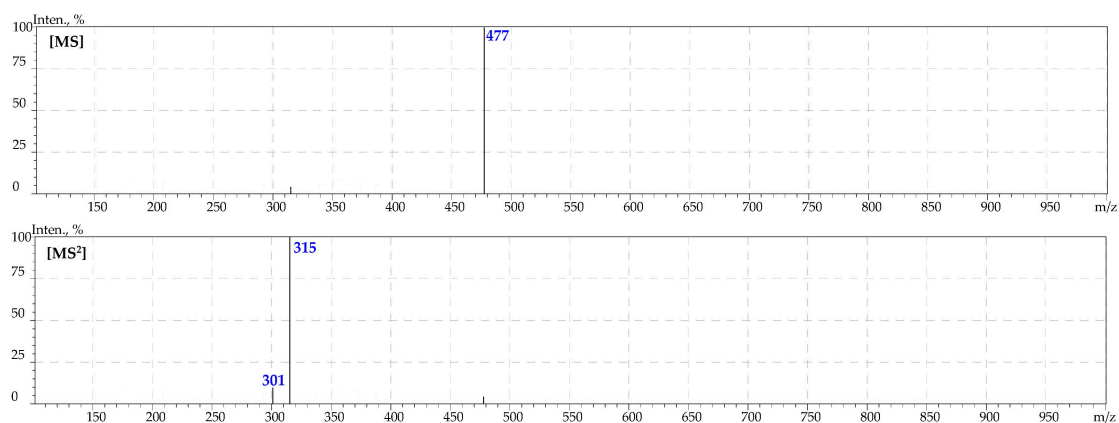

Figure S1-34. MS and MS<sup>2</sup> spectra of nepetin-4'-O-glucoside (compound 34).

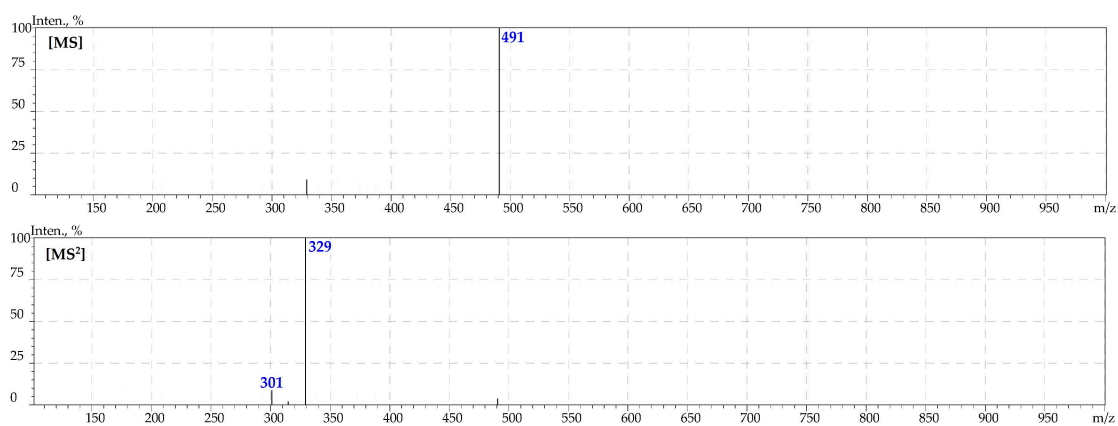

Figure S1-35. MS and MS<sup>2</sup> spectra of 6-hydroxyluteolin-dimethyl ether-O-hexoside (compound 35).

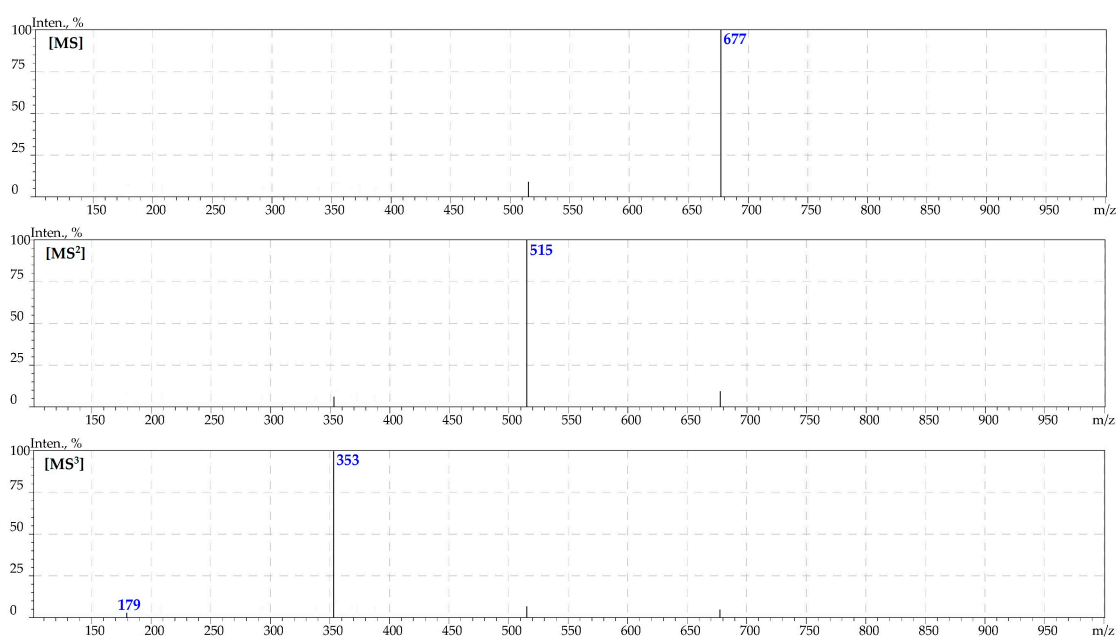

Figure S1-36. MS, MS<sup>2</sup> and MS<sup>3</sup> spectra of 3,4,5-tri-O-caffeoylquinic acid (compound 36).

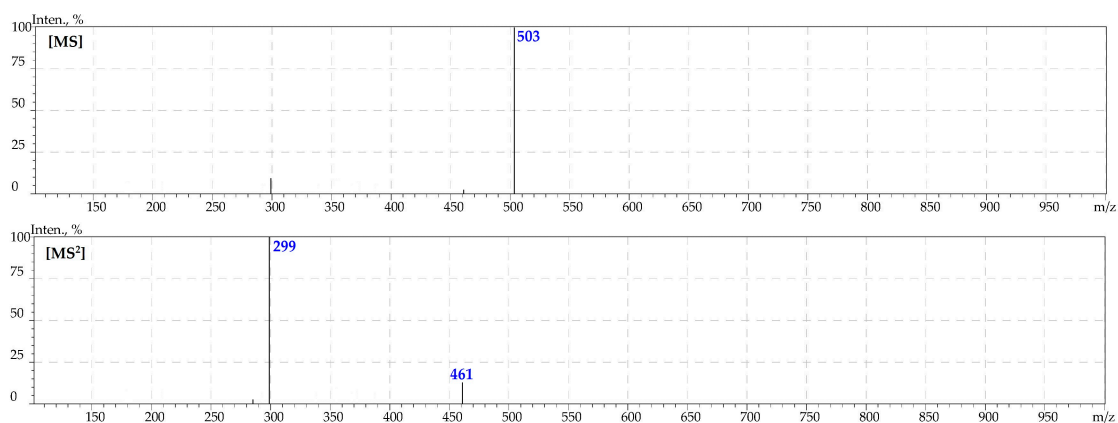

Figure S1-37. MS and MS<sup>2</sup> spectra of chrysoeriol-O-acetyl-hexoside (compound 37).



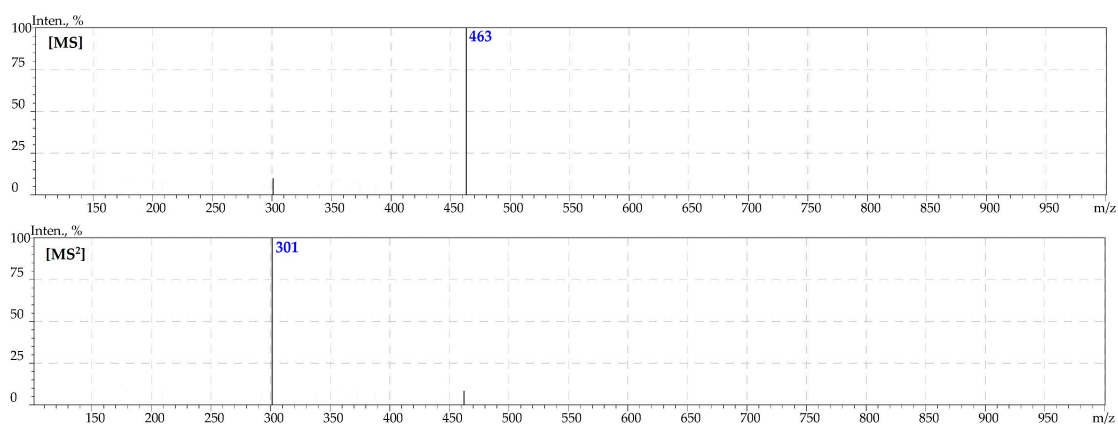

**Figure S1-38.** MS and MS<sup>2</sup> spectra of rhaunside C (compound 38; 6-hydroxyluteolin-4'-O-glucoside).

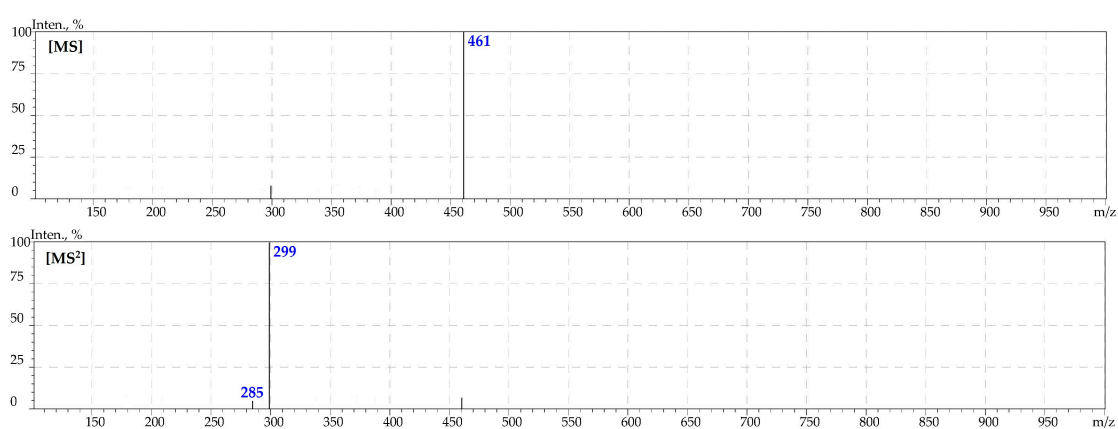

**Figure S1-39.** MS and MS<sup>2</sup> spectra of chrysoeriol-5-O-glucoside (compound 39).

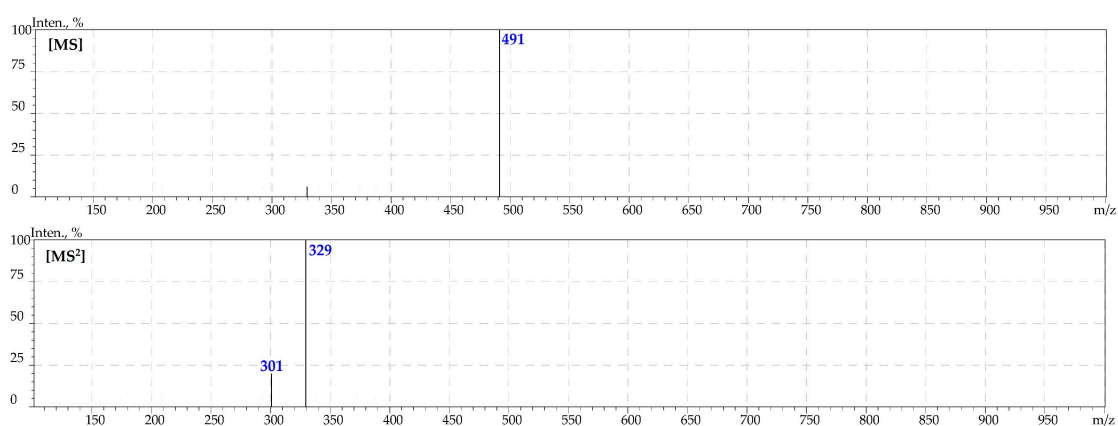

**Figure S1-40.** MS and MS<sup>2</sup> spectra of 6-hydroxyluteolin-dimethyl ether-O-hexoside (compound 40).

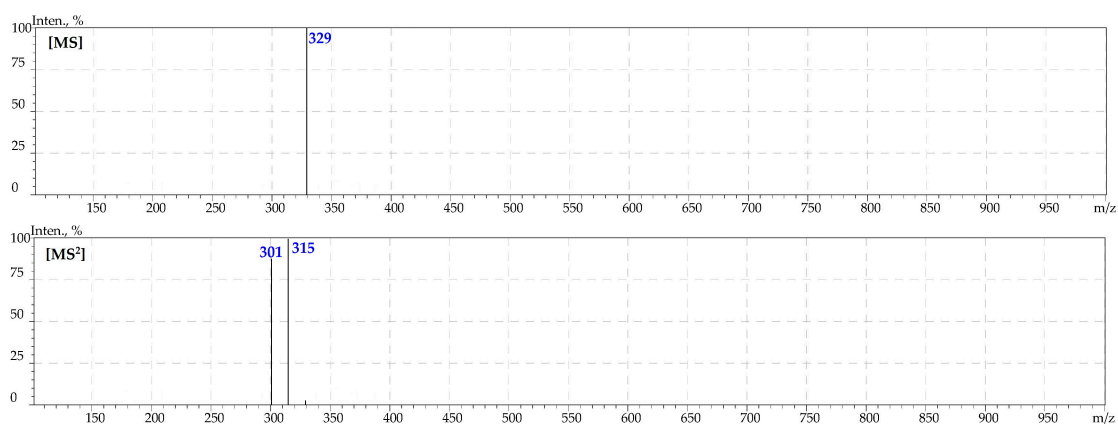

Figure S1-41. MS and MS<sup>2</sup> spectra of tricrin (compound 41).

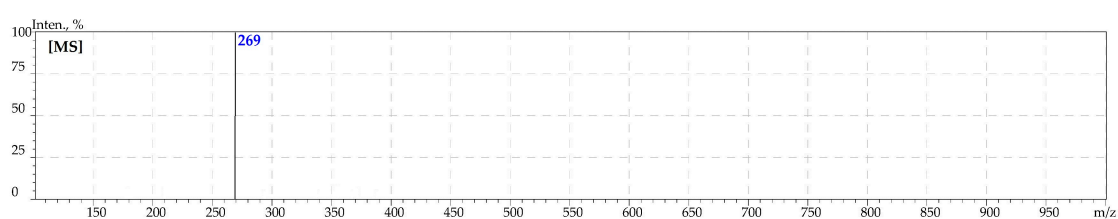

Figure S1-42. MS spectrum of apigenin (compound 42).

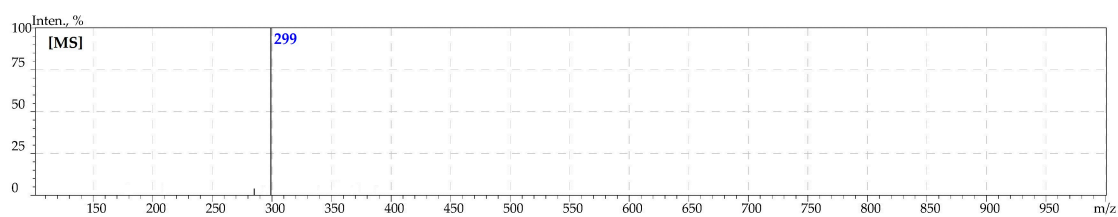

Figure S1-43. MS spectrum of hispidulin (compound 43).

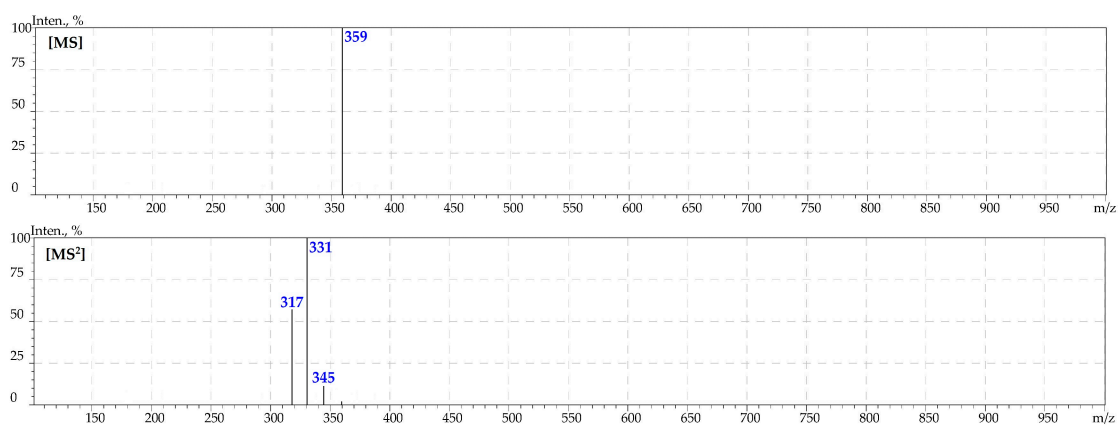

Figure S1-44. MS and MS<sup>2</sup> spectra of 5,7,3'-trihydroxy-6,4',5'-trimethoxyflavone (compound 44; tentative).

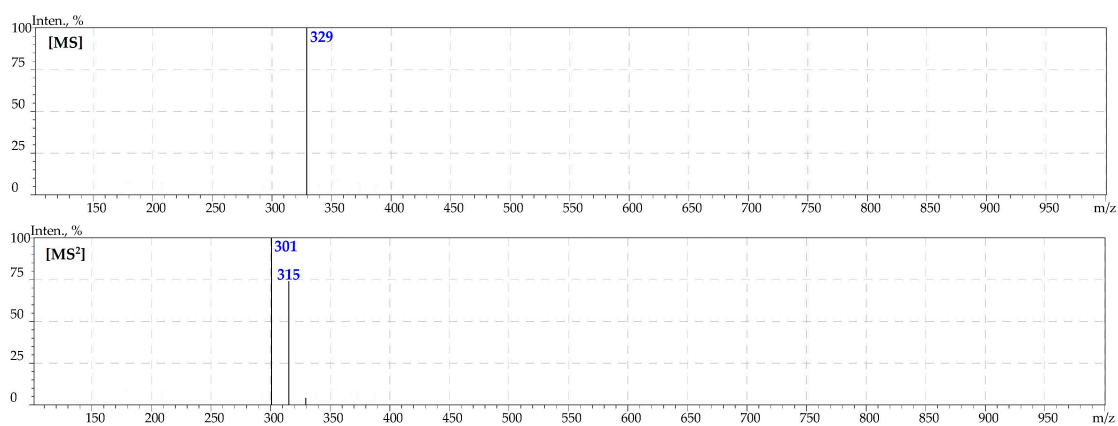

**Figure S1-45.** MS and MS<sup>2</sup> spectra of jaceosidin (compound 45).

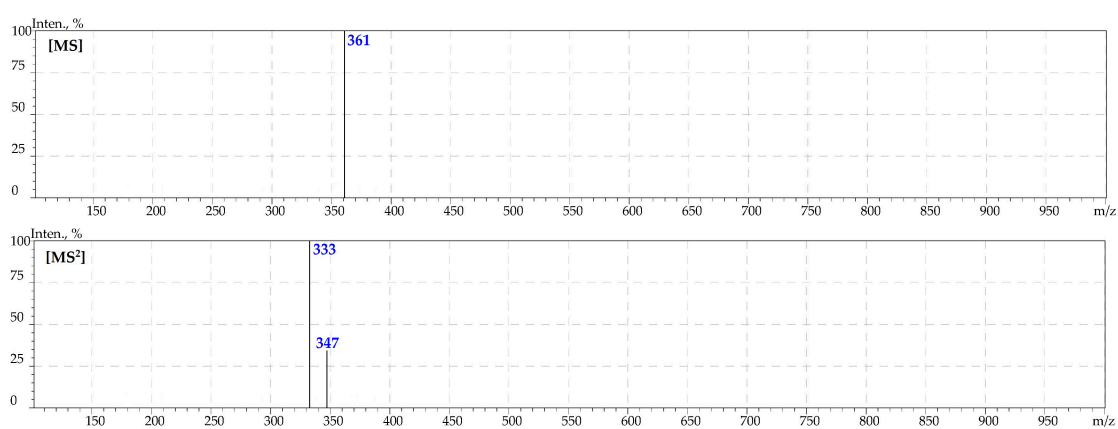

**Figure S1-46.** MS and MS<sup>2</sup> spectra of 5,7,3',4',5'-pentahydroxy-6,8-dimethoxyflavone (compound 46; tentative).

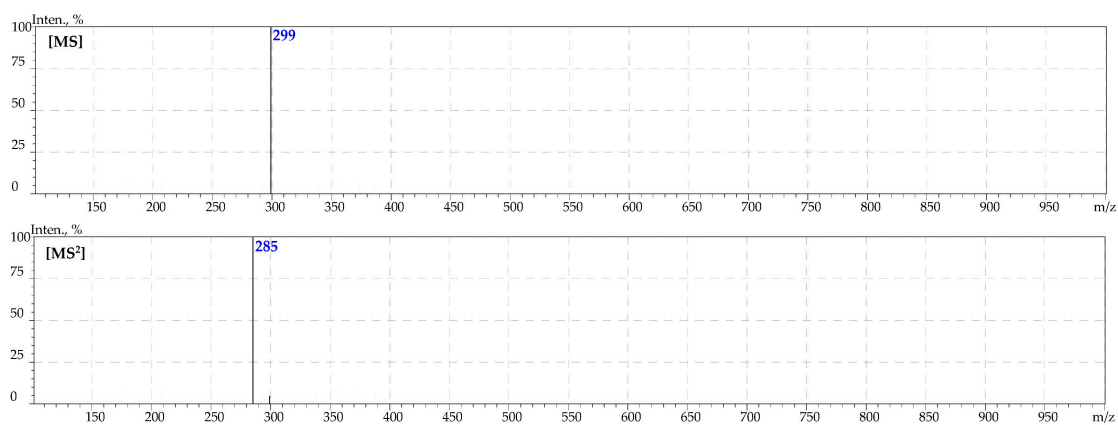

**Figure S1-47.** MS and MS<sup>2</sup> spectra of chrysoeriol (compound 47).

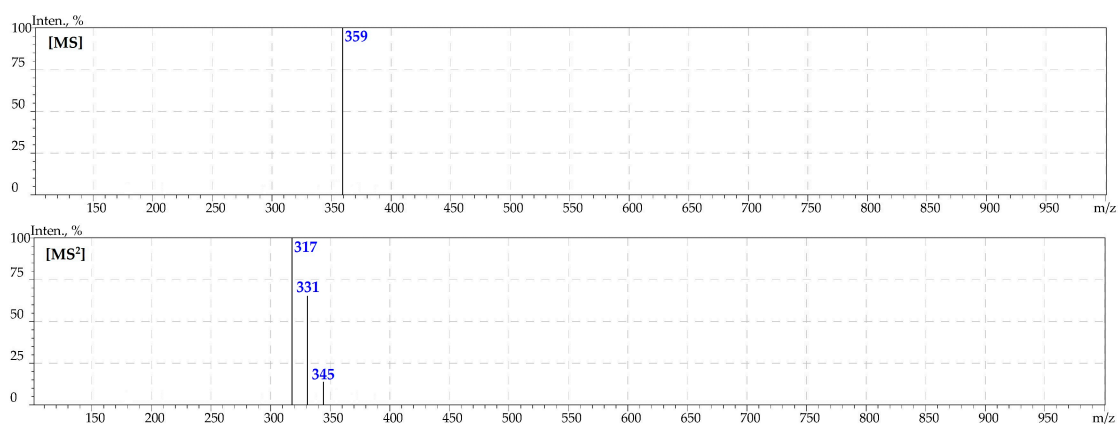

**Figure S1-48.** MS and MS<sup>2</sup> spectra of 5,7,4'-trihydroxy-6,3',5'-trimethoxyflavone (compound 48; tentative).

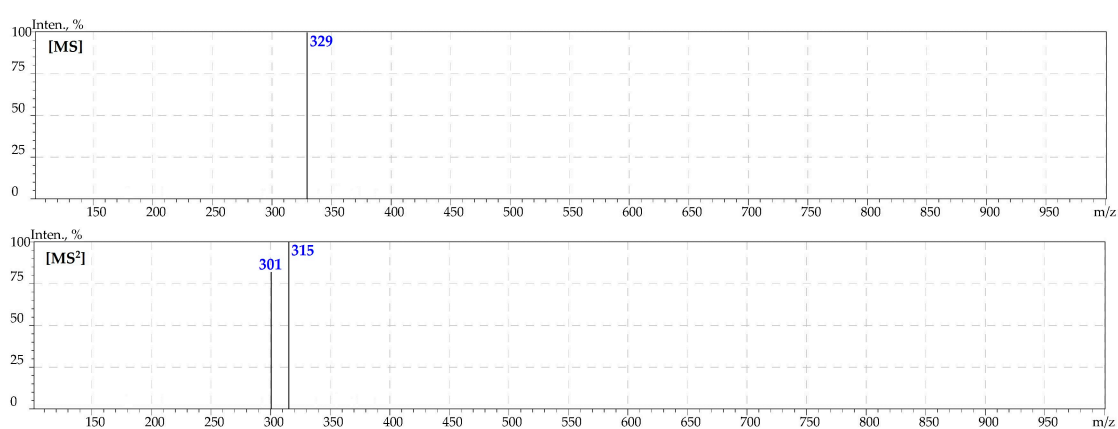

**Figure S1-49.** MS and MS<sup>2</sup> spectra of desmethylcentaureidin (compound 49).

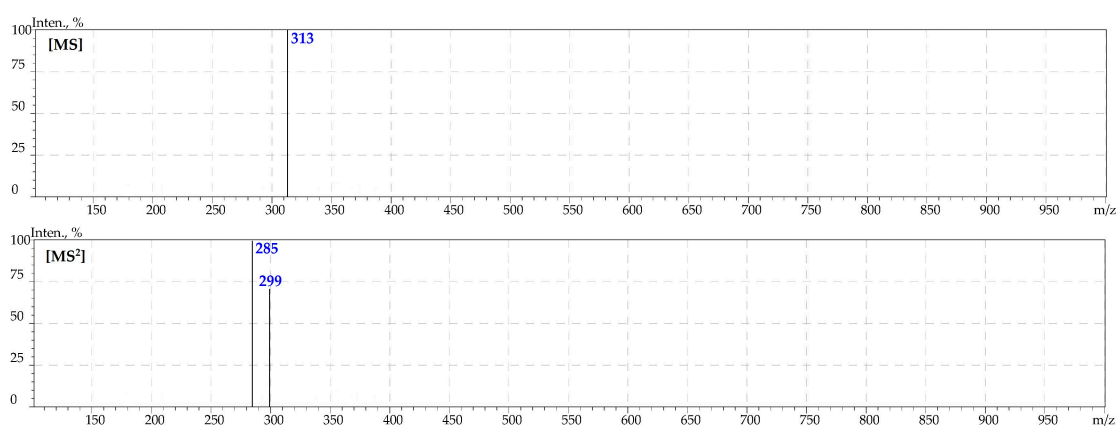

**Figure S1-50.** MS and MS<sup>2</sup> spectra of luteolin-3',4'-dimethyl ether (compound 50).

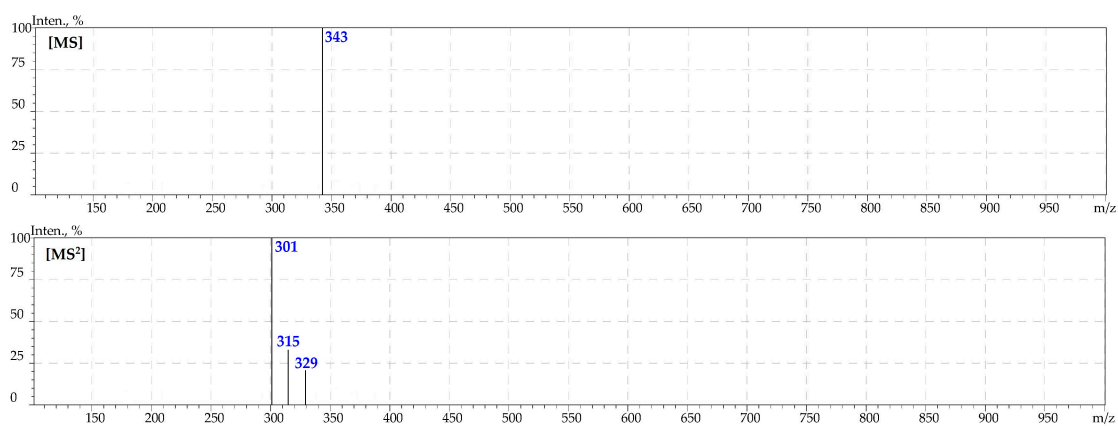

Figure S1-51. MS and MS<sup>2</sup> spectra of eupatorin (compound 51).

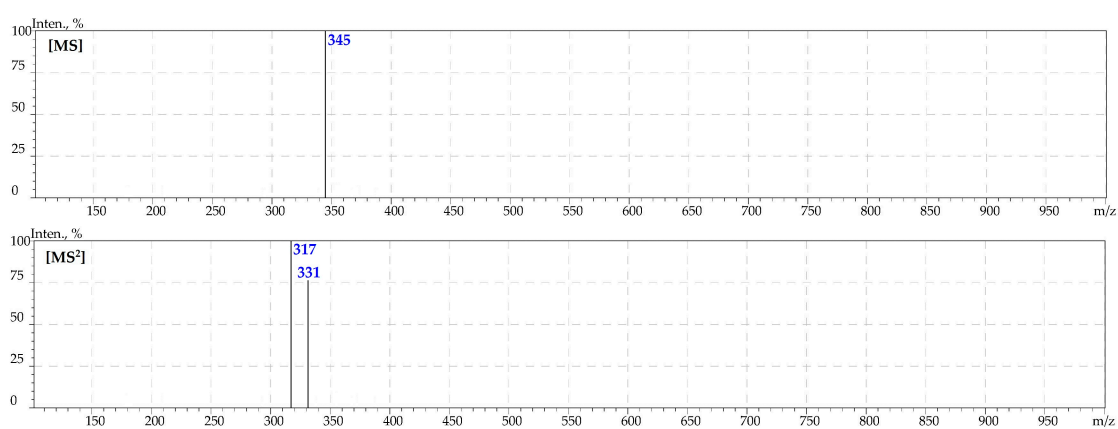

Figure S1-52. MS and MS<sup>2</sup> spectra of 5,7,3',4'-tetrahydroxy-6,5'-dimethoxyflavone (compound 52).

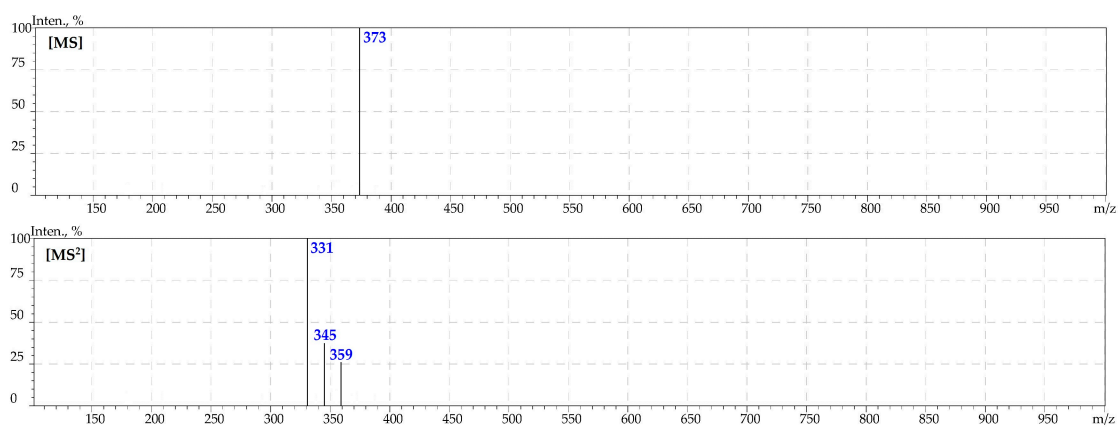

Figure S1-53. MS and MS<sup>2</sup> spectra of quercetagetin-3,6,3',4'-tetramethyl ether (compound 53).

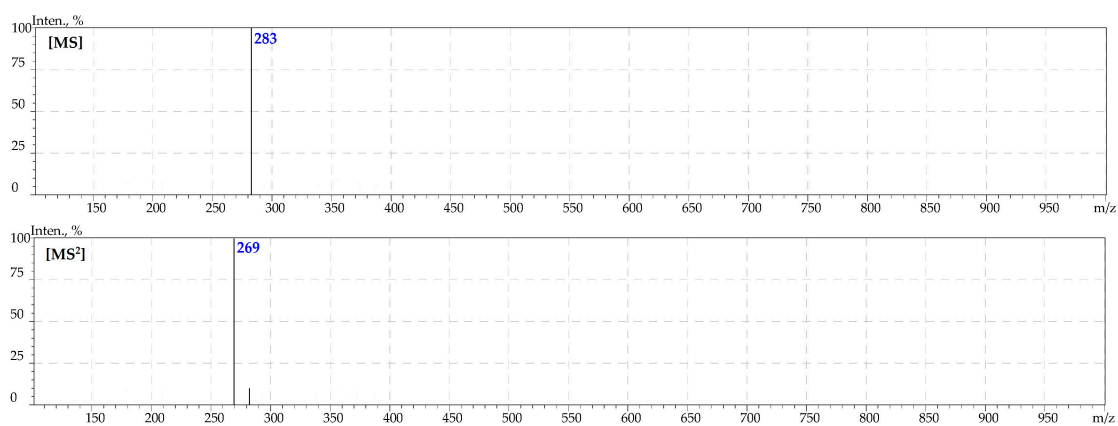

Figure S1-54. MS and MS<sup>2</sup> spectra of acacetin (compound 54).

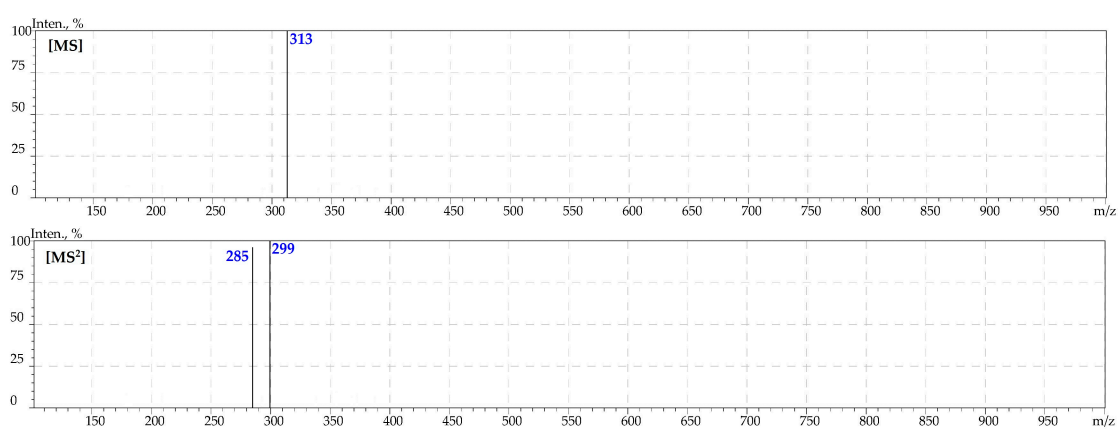

Figure S1-55. MS and MS<sup>2</sup> spectra of cirsimaritin (compound 55).

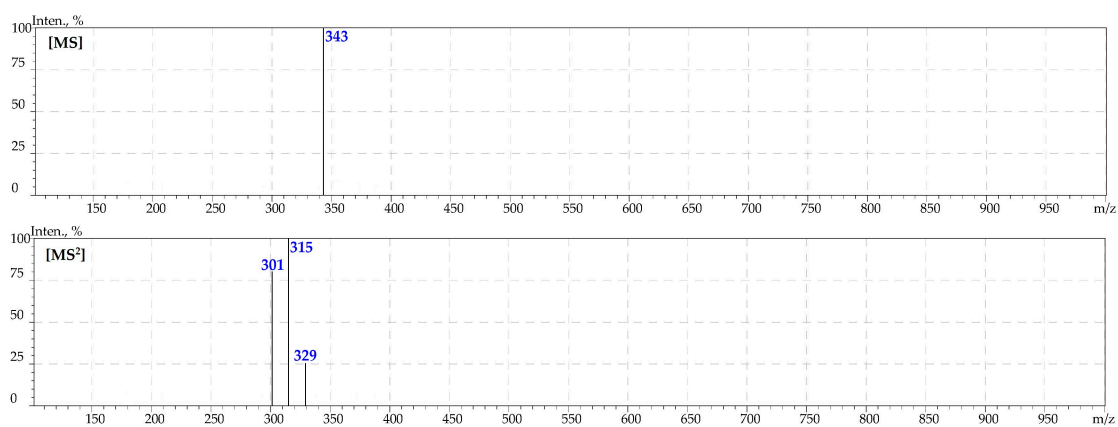

Figure S1-56. MS and MS<sup>2</sup> spectra of cirsilineol (compound 56).

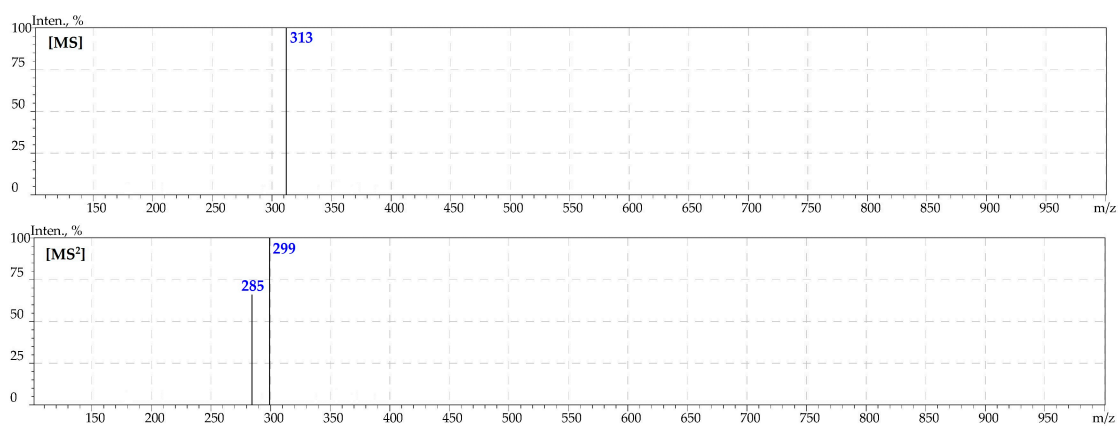

Figure S1-57. MS and MS<sup>2</sup> spectra of velutin (compound 57).

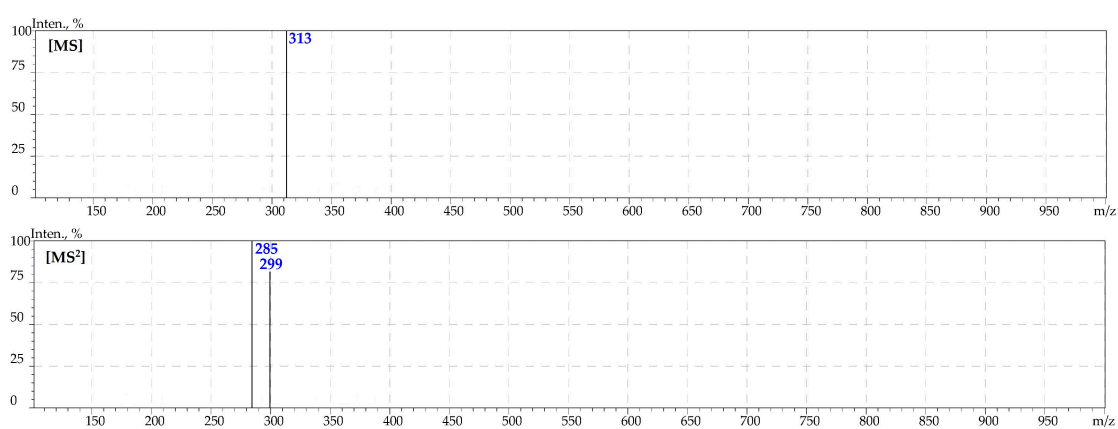

Figure S1-58. MS and MS<sup>2</sup> spectra of pilloin (compound 58).

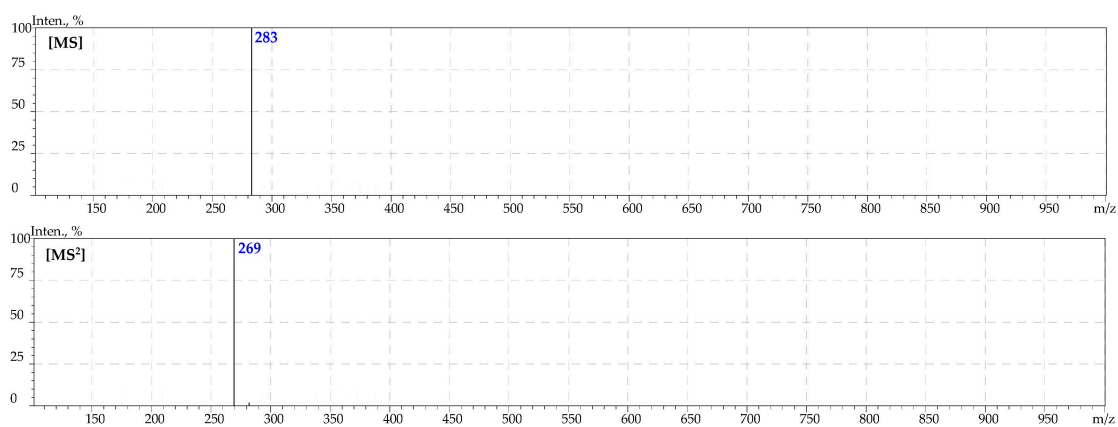

Figure S1-59. MS and MS<sup>2</sup> spectra of genkwanin (compound 59)

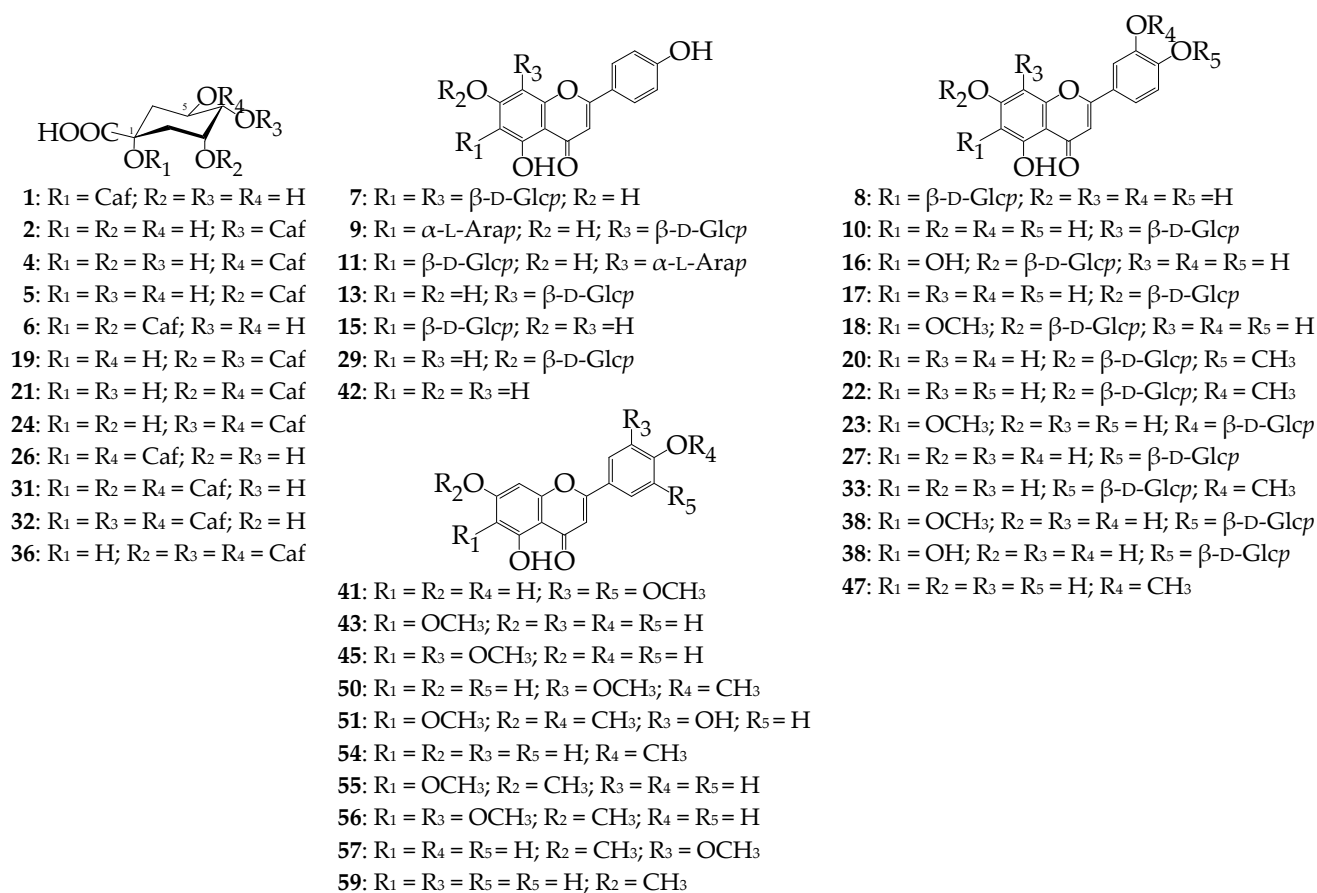

**Figure S2.** Structures of reference standards used in present work. Abbreviations structures showed below.

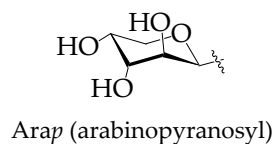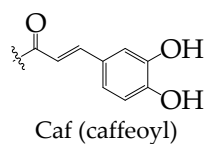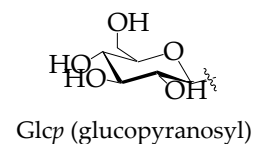



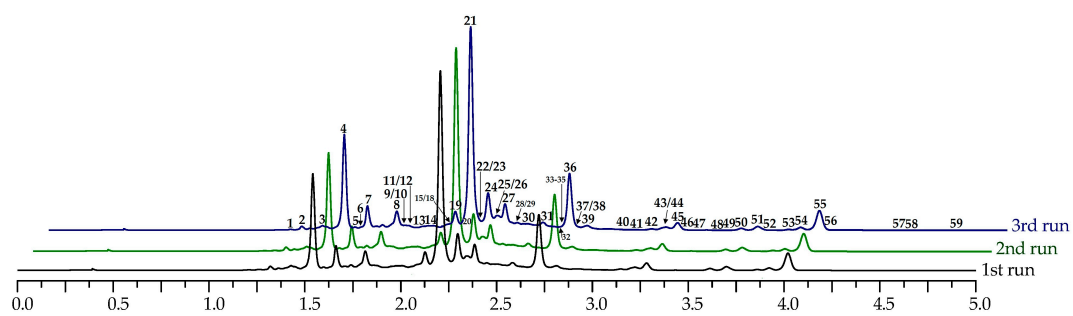

**Figure S3.** A series of three successive chromatograms of *A. frigida* extract demonstrating good reproducibility of the method used. Compounds are numbered as listed in Table 2.

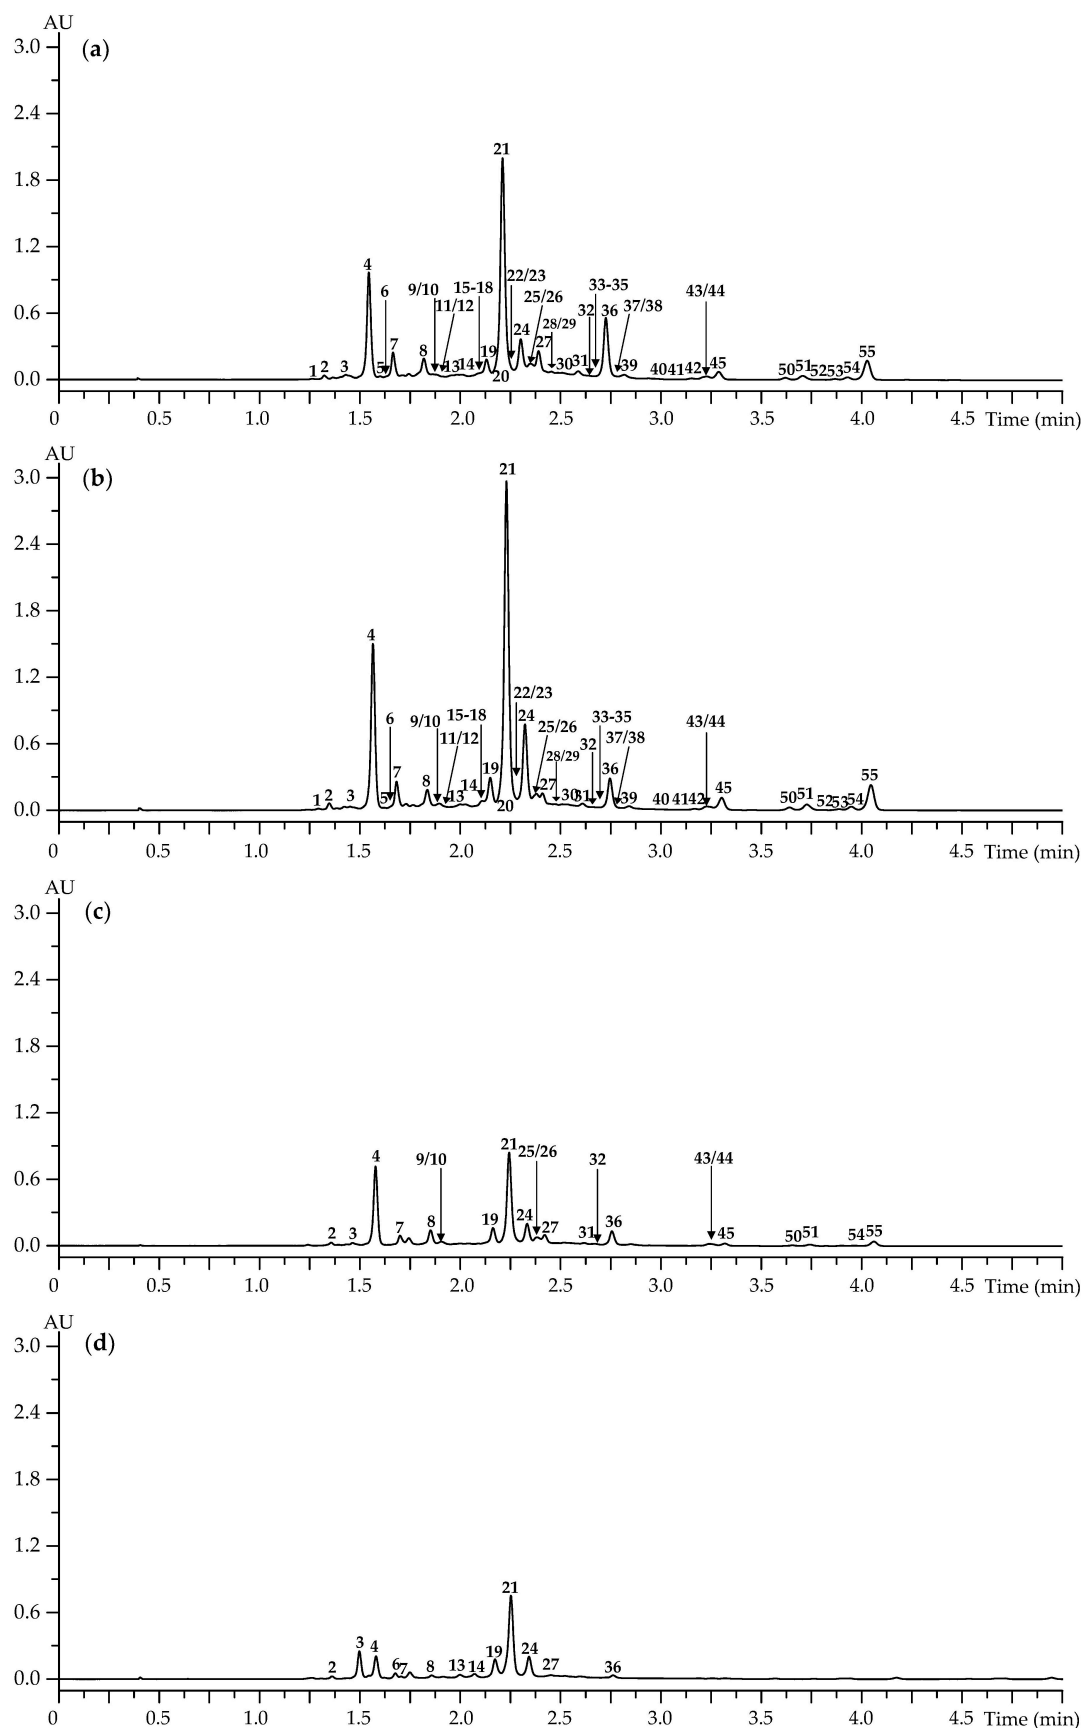

**Figure S4.** HPLC-DAD chromatograms (330 nm) of *A. frigida* extract of leaves (a), flowers (b), stems (c), and roots (d). Compounds are numbered as listed in Table 2.

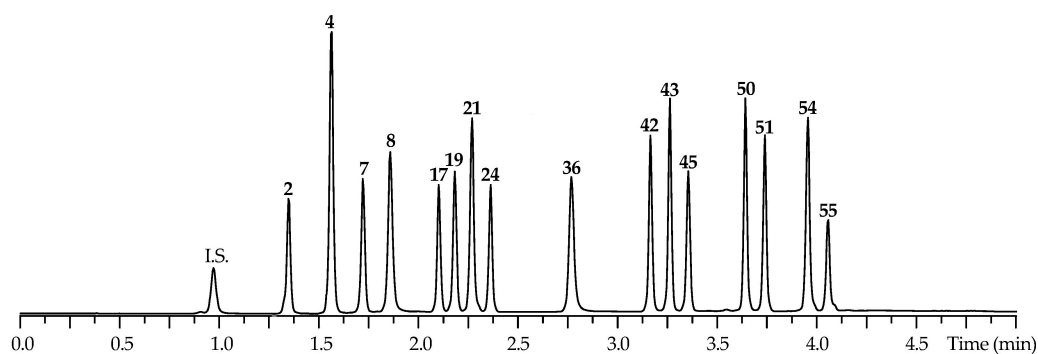

**Figure S5.** HPLC-DAD chromatogram of the reference mixture of 16 pure compounds and internal standard (I.S., scopoletin-7-*O*-neohesperidoside). Compounds: **2**—4-*O*-caffeoylquinic acid; **4**—5-*O*-caffeoylquinic acid; **7**—vicenin-2; **8**—isoorientin; **17**—cynaroside; **19**—3,4-di-*O*-caffeoylquinic acid; **21**—3,5-di-*O*-caffeoylquinic acid; **24**—4,5-di-*O*-caffeoylquinic acid; **36**—3,4,5-tri-*O*-caffeoylquinic acid; **42**—apigenin; **43**—hispidulin; **45**—jaceosidin; **50**—luteolin-3',4'-dimethyl ester; **51**—eupatorin; **54**—acacetin; **55**—cirsimaritin.

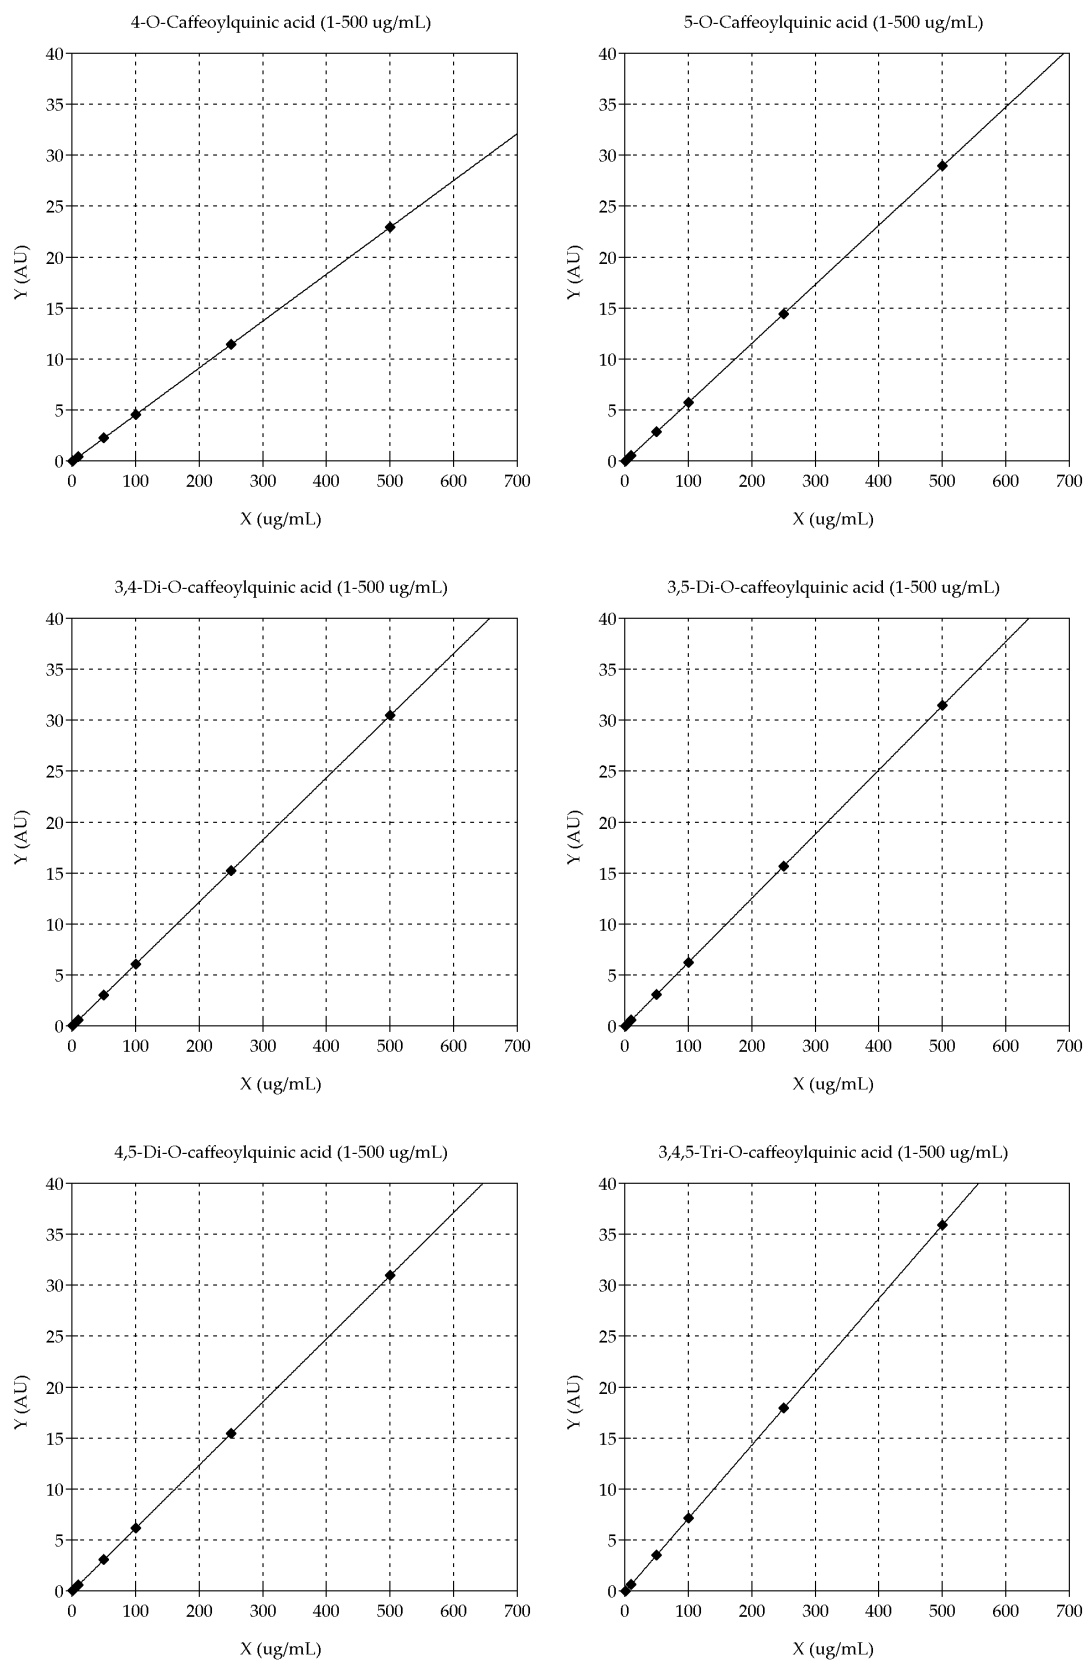

Figure S6. Calibration curves for 16 reference compounds used for quantitative HPLC-DAD assay.

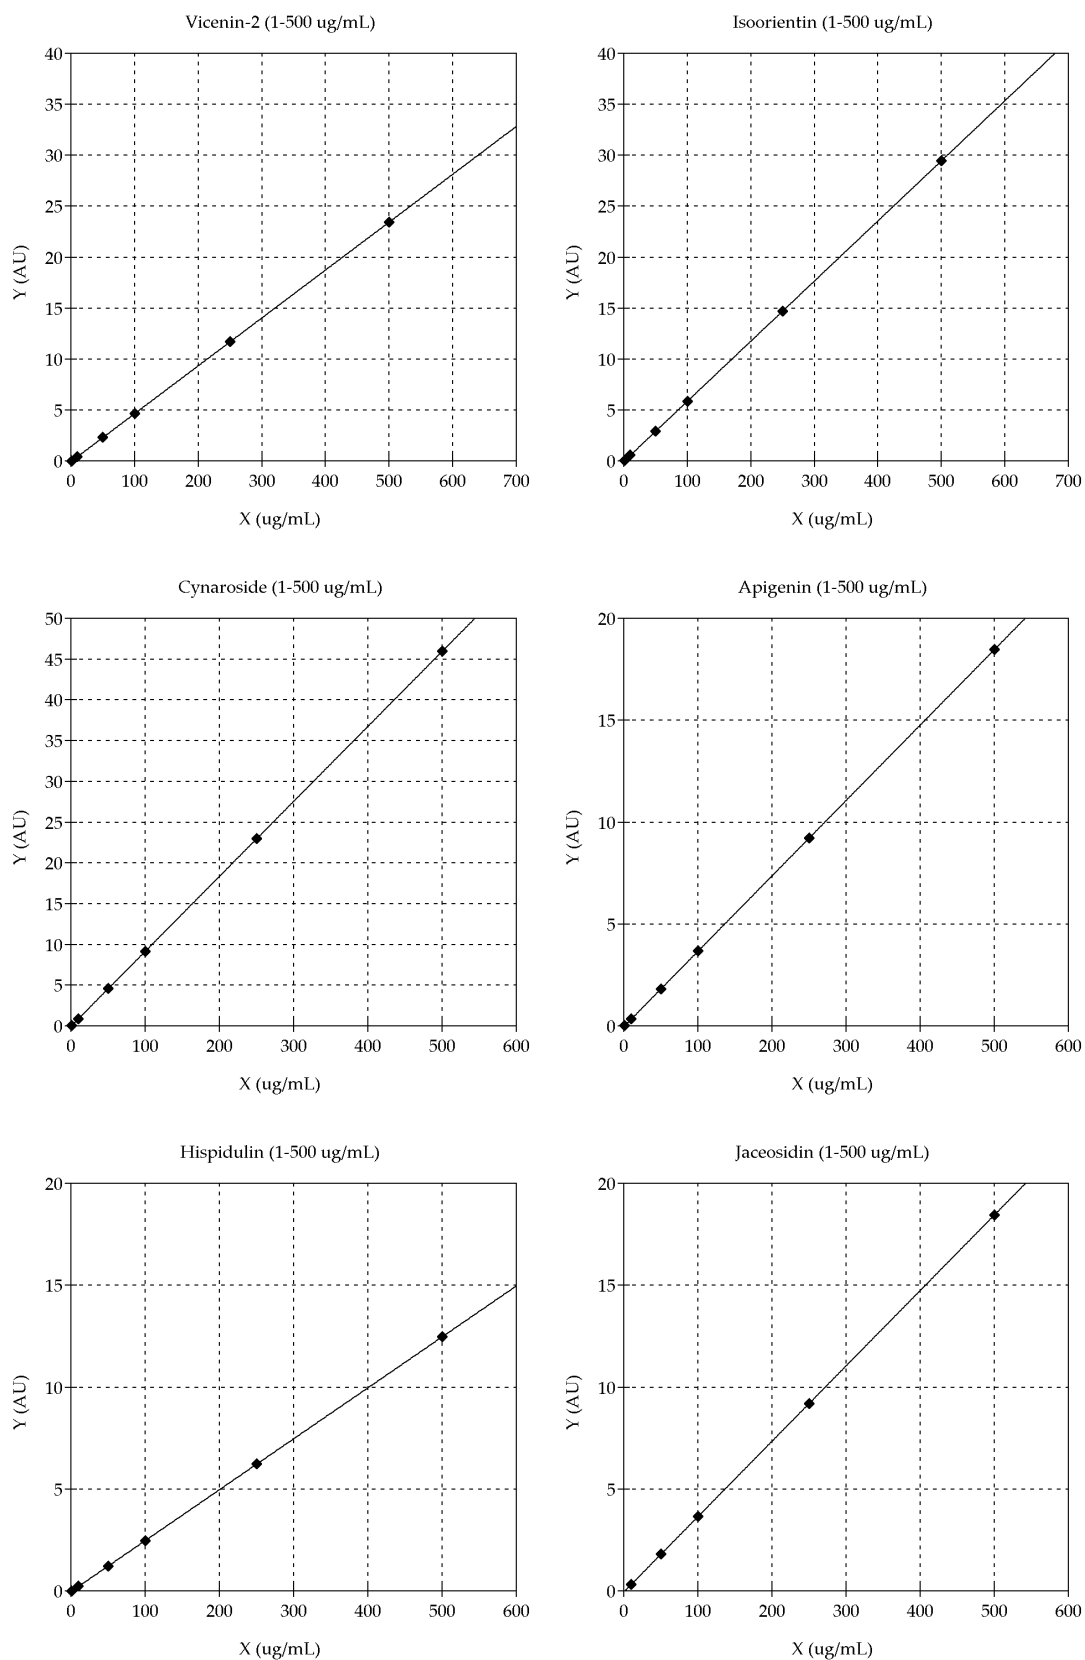

Figure S6. Continuation.

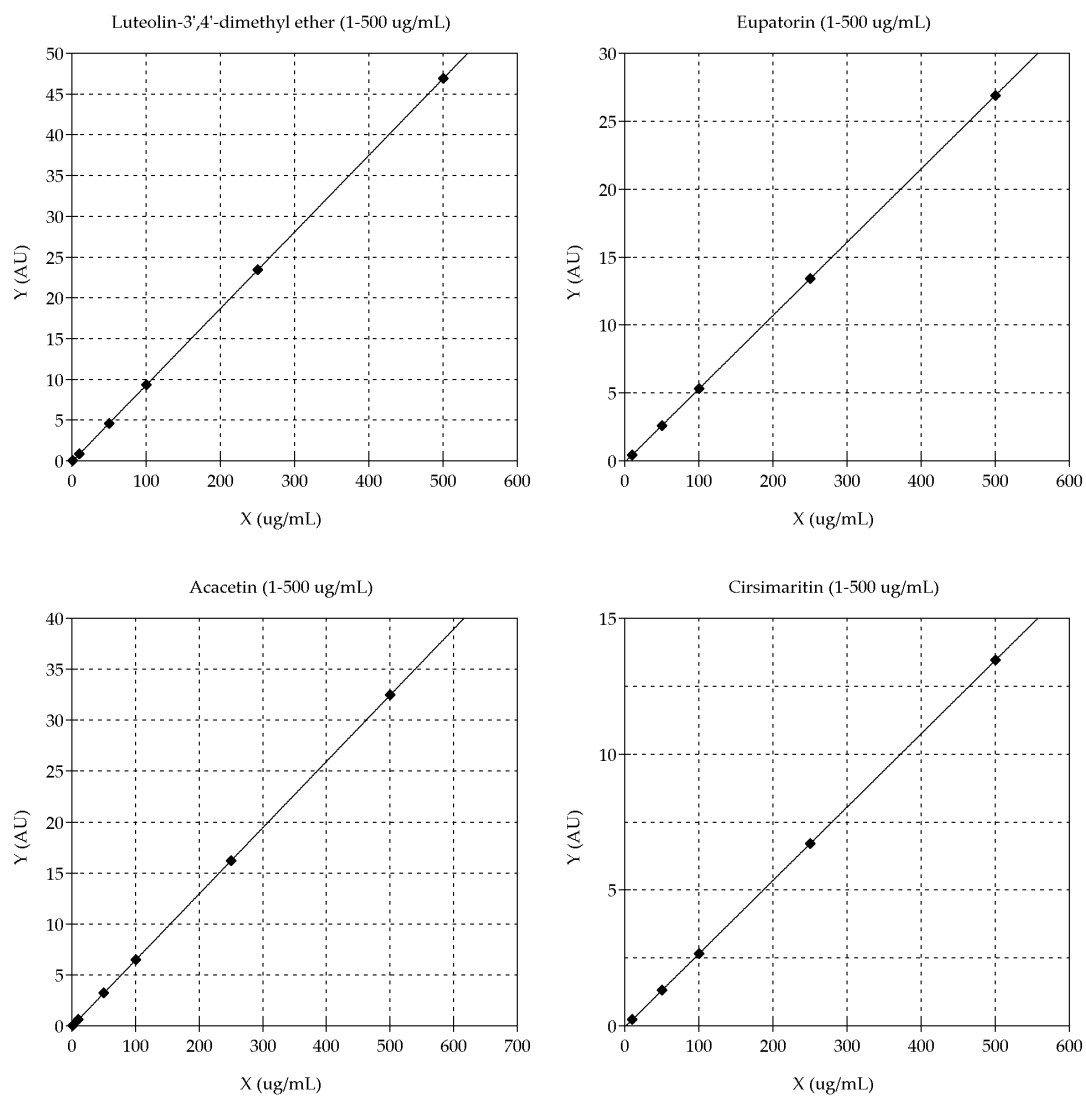

Figure S6. Continuation.

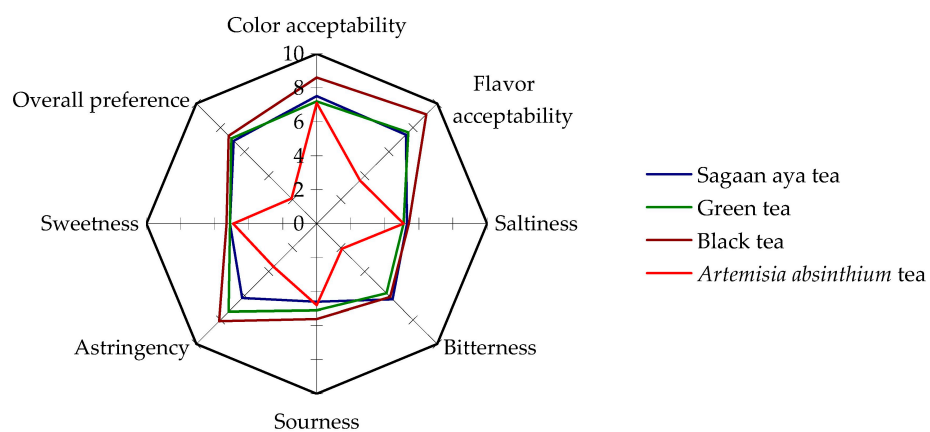

**Figure S7.** Sensory profiles of *A. frigida* herbal tea, green tea, black tea and *Artemisia absinthium* tea according to 30 participants estimation. Preference scale ranged from 0 (greatest imaginary dislike) to 10 (greatest imaginary like).

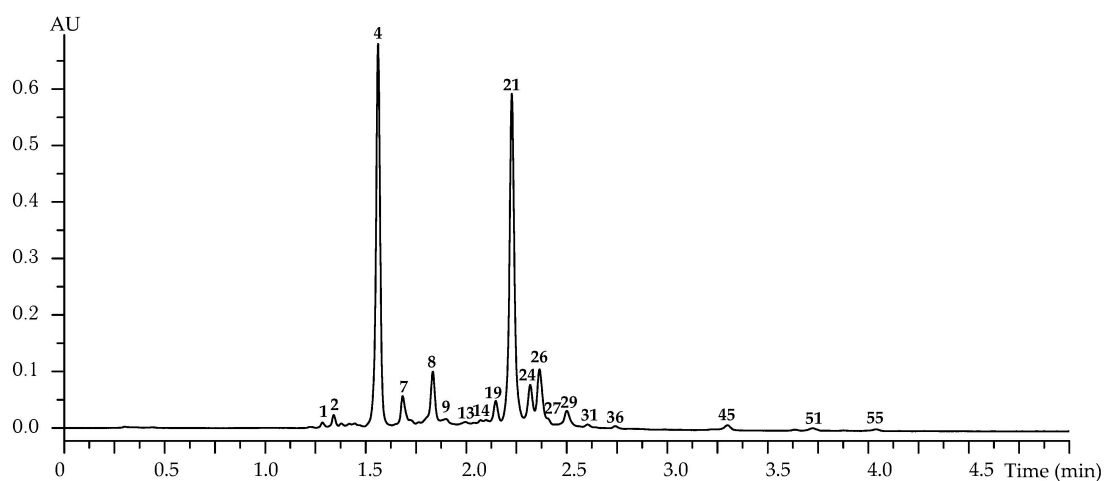

**Figure S8.** HPLC-DAD chromatogram of *A. frigida* herbal tea. Compounds are numbered as listed in Table 2.

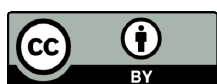

Supplement: antioxidants-08-00307-s001.pdf [file antioxidants-08-00307-s001.pdf]
